# Supplementary material for: Synthesis and crystal characteristics of nirmatrelvir
Source: Royal Society of Chemistry journal article supplement (doi:10.1039/d3re00019b), 2023-01-01

## checkCIF/PLATON report

Structure factors have been supplied for datablock(s) cu\_20221250\_0m

THIS REPORT IS FOR GUIDANCE ONLY. IF USED AS PART OF A REVIEW PROCEDURE FOR PUBLICATION, IT SHOULD NOT REPLACE THE EXPERTISE OF AN EXPERIENCED CRYSTALLOGRAPHIC REFEREE.

No syntax errors found.      CIF dictionary      Interpreting this report

### Datablock: cu\_20221250\_0m

---

|                        |                  |                      |               |
|------------------------|------------------|----------------------|---------------|
| Bond precision:        | C-C = 0.0049 Å   | Wavelength=1.54178   |               |
| Cell:                  | a=9.6891 (4)     | b=15.0403 (6)        | c=18.0395 (7) |
|                        | alpha=90         | beta=90              | gamma=90      |
| Temperature:           | 298 K            |                      |               |
|                        | Calculated       | Reported             |               |
| Volume                 | 2628.84 (18)     | 2628.84 (18)         |               |
| Space group            | P 21 21 21       | P 21 21 21           |               |
| Hall group             | P 2ac 2ab        | P 2ac 2ab            |               |
| Moiety formula         | C23 H32 F3 N5 O4 | 4 (C23 H32 F3 N5 O4) |               |
| Sum formula            | C23 H32 F3 N5 O4 | C92 H124 F12 N16 O20 |               |
| Mr                     | 499.54           | 2002.06              |               |
| Dx, g cm <sup>-3</sup> | 1.262            | 1.265                |               |
| Z                      | 4                | 1                    |               |
| Mu (mm <sup>-1</sup> ) | 0.862            | 0.882                |               |
| F000                   | 1056.0           | 1056.0               |               |
| F000'                  | 1059.74          |                      |               |
| h, k, lmax             | 12, 18, 22       | 11, 18, 22           |               |
| Nref                   | 5379 [ 3040]     | 5247                 |               |
| Tmin, Tmax             | 0.809, 0.916     | 0.545, 0.754         |               |
| Tmin'                  | 0.768            |                      |               |

Correction method= # Reported T Limits: Tmin=0.545 Tmax=0.754  
AbsCorr = NONE

Data completeness= 1.73/0.98      Theta(max)= 74.547

|                                |                   |
|--------------------------------|-------------------|
| R(reflections)= 0.0457 ( 4272) | wR2(reflections)= |
| S = 1.076                      | 0.1183 ( 5247)    |
| Npar= 348                      |                   |

---

The following ALERTS were generated. Each ALERT has the format

**test-name\_ALERT\_alert-type\_alert-level.**

Click on the hyperlinks for more details of the test.

---

### ● Alert level C

|                   |                                                  |                |              |
|-------------------|--------------------------------------------------|----------------|--------------|
| PLAT041_ALERT_1_C | Calc. and Reported SumFormula                    | Strings Differ | Please Check |
| PLAT043_ALERT_1_C | Calculated and Reported Mol. Weight              | Differ by ..   | 0.98 Check   |
| PLAT057_ALERT_3_C | Correction for Absorption Required               | RT(exp) ...    | 1.13 Do !    |
| PLAT234_ALERT_4_C | Large Hirshfeld Difference F2                    | --C1 .         | 0.20 Ang.    |
| PLAT234_ALERT_4_C | Large Hirshfeld Difference F3                    | --C1 .         | 0.22 Ang.    |
| PLAT242_ALERT_2_C | Low 'MainMol' Ueq as Compared to Neighbors of    |                | C4 Check     |
| PLAT340_ALERT_3_C | Low Bond Precision on C-C Bonds .....            |                | 0.00495 Ang. |
| PLAT911_ALERT_3_C | Missing FCF Refl Between Thmin & STh/L=          | 0.600          | 26 Report    |
| PLAT913_ALERT_3_C | Missing # of Very Strong Reflections in FCF .... |                | 15 Note      |

---

### ● Alert level G

FORMU01\_ALERT\_1\_G There is a discrepancy between the atom counts in the  
\_chemical\_formula\_sum and \_chemical\_formula\_moiety. This is  
usually due to the moiety formula being in the wrong format.  
Atom count from \_chemical\_formula\_sum: C92 H124 F12 N16 O20  
Atom count from \_chemical\_formula\_moiety:C92 H128 F12 N20 O16

FORMU01\_ALERT\_2\_G There is a discrepancy between the atom counts in the  
\_chemical\_formula\_sum and the formula from the \_atom\_site\* data.  
Atom count from \_chemical\_formula\_sum:C92 H124 F12 N16 O20  
Atom count from the \_atom\_site data: C92 H128 F12 N20 O16

CELLZ01\_ALERT\_1\_G Difference between formula and atom\_site contents detected.

CELLZ01\_ALERT\_1\_G ALERT: Large difference may be due to a  
symmetry error - see SYMMG tests  
From the CIF: \_cell\_formula\_units\_Z 1  
From the CIF: \_chemical\_formula\_sum C92 H124 F12 N16 O20  
TEST: Compare cell contents of formula and atom\_site data

| atom | Z*formula | cif sites | diff  |
|------|-----------|-----------|-------|
| C    | 92.00     | 92.00     | 0.00  |
| H    | 124.00    | 128.00    | -4.00 |
| F    | 12.00     | 12.00     | 0.00  |
| N    | 16.00     | 20.00     | -4.00 |
| O    | 20.00     | 16.00     | 4.00  |

|                   |                                                  |                |            |
|-------------------|--------------------------------------------------|----------------|------------|
| PLAT003_ALERT_2_G | Number of Uiso or Uij Restrained non-H Atoms ... |                | 2 Report   |
| PLAT007_ALERT_5_G | Number of Unrefined Donor-H Atoms .....          |                | 3 Report   |
| PLAT045_ALERT_1_G | Calculated and Reported Z Differ by a Factor ... |                | 4 Check    |
| PLAT186_ALERT_4_G | The CIF-Embedded .res File Contains ISOR Records |                | 1 Report   |
| PLAT242_ALERT_2_G | Low 'MainMol' Ueq as Compared to Neighbors of    |                | C1 Check   |
| PLAT300_ALERT_4_G | Atom Site Occupancy of F00M                      | Constrained at | 0.75 Check |
| PLAT300_ALERT_4_G | Atom Site Occupancy of F00T                      | Constrained at | 0.75 Check |
| PLAT300_ALERT_4_G | Atom Site Occupancy of F00U                      | Constrained at | 0.75 Check |
| PLAT300_ALERT_4_G | Atom Site Occupancy of F1                        | Constrained at | 0.25 Check |
| PLAT300_ALERT_4_G | Atom Site Occupancy of F2                        | Constrained at | 0.25 Check |
| PLAT300_ALERT_4_G | Atom Site Occupancy of F3                        | Constrained at | 0.25 Check |
| PLAT301_ALERT_3_G | Main Residue Disorder .....                      | (Resd 1 )      | 9% Note    |
| PLAT367_ALERT_2_G | Long? C(sp?)-C(sp?) Bond C1                      | - C2 .         | 1.51 Ang.  |
| PLAT720_ALERT_4_G | Number of Unusual/Non-Standard Labels .....      |                | 3 Note     |
| PLAT791_ALERT_4_G | Model has Chirality at C3                        | (Sohnke SpGr)  | S Verify   |
| PLAT791_ALERT_4_G | Model has Chirality at C10                       | (Sohnke SpGr)  | S Verify   |

|                                                                    |               |          |
|--------------------------------------------------------------------|---------------|----------|
| PLAT791_ALERT_4_G Model has Chirality at C11                       | (Sohnke SpGr) | R Verify |
| PLAT791_ALERT_4_G Model has Chirality at C12                       | (Sohnke SpGr) | S Verify |
| PLAT791_ALERT_4_G Model has Chirality at C17                       | (Sohnke SpGr) | S Verify |
| PLAT791_ALERT_4_G Model has Chirality at C20                       | (Sohnke SpGr) | S Verify |
| PLAT860_ALERT_3_G Number of Least-Squares Restraints .....         |               | 12 Note  |
| PLAT912_ALERT_4_G Missing # of FCF Reflections Above STh/L= 0.600  |               | 25 Note  |
| PLAT978_ALERT_2_G Number C-C Bonds with Positive Residual Density. |               | 1 Info   |
| PLAT992_ALERT_5_G Repd & Actual _reflns_number_gt Values Differ by |               | 2 Check  |

---

0 **ALERT level A** = Most likely a serious problem – resolve or explain  
 0 **ALERT level B** = A potentially serious problem, consider carefully  
 9 **ALERT level C** = Check. Ensure it is not caused by an omission or oversight  
 28 **ALERT level G** = General information/check it is not something unexpected

6 ALERT type 1 CIF construction/syntax error, inconsistent or missing data  
 6 ALERT type 2 Indicator that the structure model may be wrong or deficient  
 6 ALERT type 3 Indicator that the structure quality may be low  
 17 ALERT type 4 Improvement, methodology, query or suggestion  
 2 ALERT type 5 Informative message, check

---

It is advisable to attempt to resolve as many as possible of the alerts in all categories. Often the minor alerts point to easily fixed oversights, errors and omissions in your CIF or refinement strategy, so attention to these fine details can be worthwhile. In order to resolve some of the more serious problems it may be necessary to carry out additional measurements or structure refinements. However, the purpose of your study may justify the reported deviations and the more serious of these should normally be commented upon in the discussion or experimental section of a paper or in the "special\_details" fields of the CIF. checkCIF was carefully designed to identify outliers and unusual parameters, but every test has its limitations and alerts that are not important in a particular case may appear. Conversely, the absence of alerts does not guarantee there are no aspects of the results needing attention. It is up to the individual to critically assess their own results and, if necessary, seek expert advice.

### Publication of your CIF in IUCr journals

A basic structural check has been run on your CIF. These basic checks will be run on all CIFs submitted for publication in IUCr journals (*Acta Crystallographica*, *Journal of Applied Crystallography*, *Journal of Synchrotron Radiation*); however, if you intend to submit to *Acta Crystallographica Section C* or *E* or *IUCrData*, you should make sure that full publication checks are run on the final version of your CIF prior to submission.

### Publication of your CIF in other journals

Please refer to the *Notes for Authors* of the relevant journal for any special instructions relating to CIF submission.

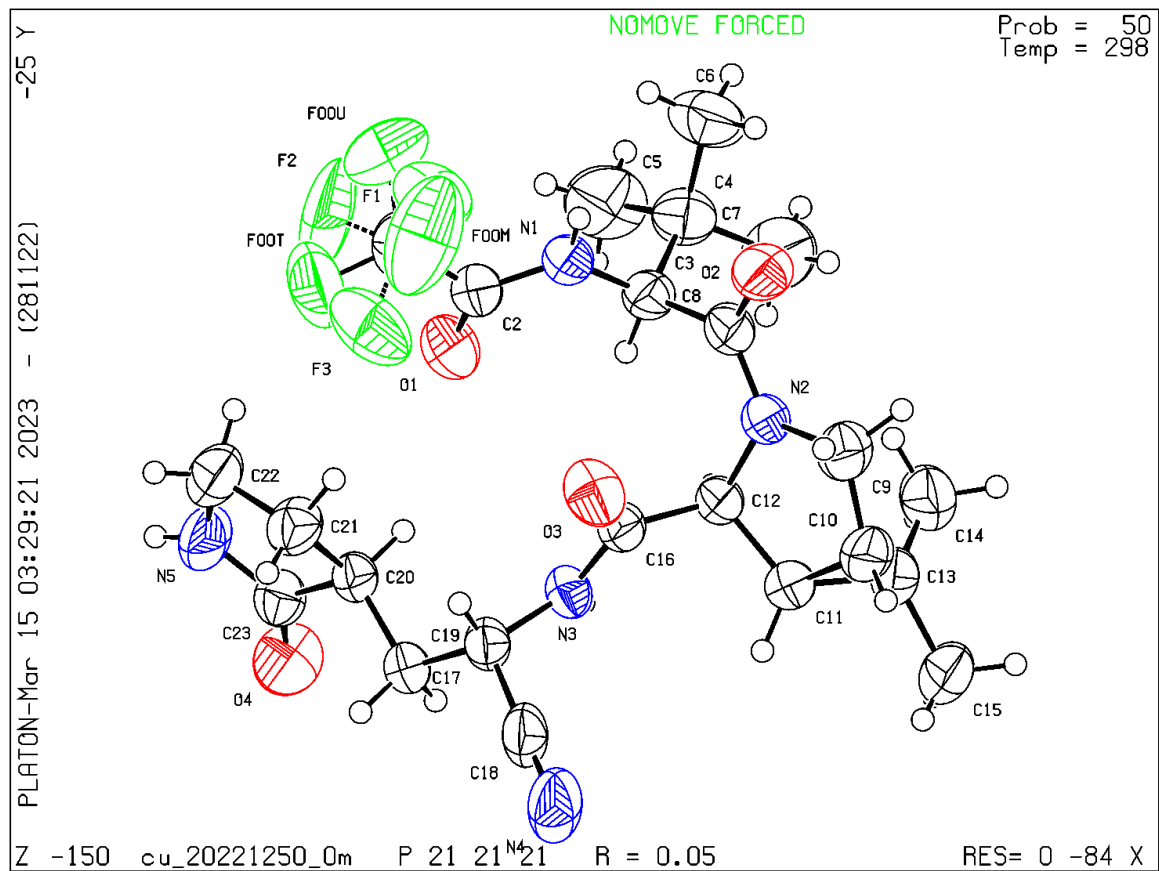

Supplement: d3re00019b1.zip [file d3re00019b1.zip]
