# Supplementary material for: Synthesis and crystal characteristics of nirmatrelvir
Source: Royal Society of Chemistry journal article supplement (doi:10.1039/d3re00019b), 2023-01-01
Supplement: d3re00019b2.pdf [file d3re00019b2.pdf]

## Supporting Information

### Synthesis and Crystal Characteristics Research of Nirmatrelvir

Bibo Jiang,<sup>†</sup> Gang Li,<sup>†</sup> Jun Yu,<sup>†</sup> Xiaoyan Xu,<sup>†</sup> Hongjuan Pan,<sup>†</sup> Chuanmeng Zhao,<sup>†</sup> Jialiang Zhong<sup>\*,†</sup>  
and Fuli Zhang<sup>\*,†</sup>

<sup>†</sup>Shanghai Institute of Pharmaceutical Industry, China State Institute of Pharmaceutical Industry, 285  
Gebaini Road, Pudong District, Shanghai 201203, P. R. of China.

Correspondence should be addressed to Jialiang Zhong; zhongjialiang@sinopharm.com

## Table of Contents

|                                                                                                                  |         |
|------------------------------------------------------------------------------------------------------------------|---------|
| 1. HPLC data, NMR, and MS of Analytical spectra of compounds <b>14, 8, 10</b> and <b>10 (IBAC solvate)</b> ..... | S03-S14 |
| 2. Analytical Spectrograms and Data of Nirmatrelvir <b>1</b> .....                                               | S14-S24 |
| 3. Analytical spectra of <b>15 &amp; 16, 18, 22, 23, 2</b> in intermediates or nirmatrelvir.....                 | S24-S33 |
| 4. Crystal void and surface area calculation of nirmatrelvir .....                                               | S34-S35 |
| 5. Interaction energy calculation of nirmatrelvir.....                                                           | S35-S38 |

1. HPLC, HRMS, and NMR Spectra of compounds 14, 8, 10 and 10, IBAC solvate.  
 1.1 HRMS, and NMR of Compound 14  
 1.1.1 HRMS

### Qualitative Compound Report

Data File: 20220729073-0802-004.d Sample Name: WOK007-8  
 Sample Type: Sample Position: Vial 9  
 Instrument Name: Instrument 1 Acq Method:  
 DA Method: Default.m Comment: lot:220627  
 AcquiredTime: 8/2/2022 10:08:35 AM DataFile: D:\MassHunter\Data\2022-08\2022-08-02\20220729073-0802-004.d

#### Compound Table

| Compound Label     | RT    | Mass    | Abund  | Formula     | Tgt Mass | Diff (ppm) |
|--------------------|-------|---------|--------|-------------|----------|------------|
| Cpd 1: C8 H13 N O2 | 0.214 | 155.095 | 497975 | C8 H13 N O2 | 155.0946 | 2.1        |

Compound Label: Cpd 1: C8 H13 N O2  
 RT: 0.214  
 Algorithm: Find By Formula  
 Mass: 155.095

#### MS Zoomed Spectrum

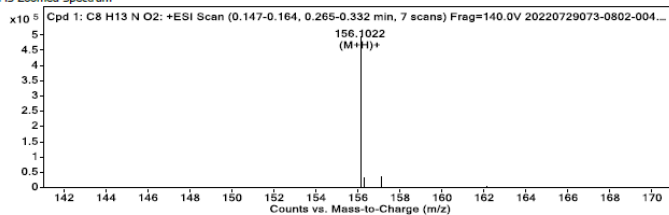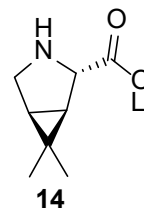

#### MS Spectrum Peak List

| m/z      | Calc m/z | Diff (ppm) | z | Abund  | Formula     | Ion    |
|----------|----------|------------|---|--------|-------------|--------|
| 156.1022 | 156.1019 | 2.09       | 1 | 497975 | C8 H14 N O2 | (M+H)+ |

--- End Of Report ---

### 1.1.2 <sup>1</sup>H NMR (D<sub>2</sub>O)

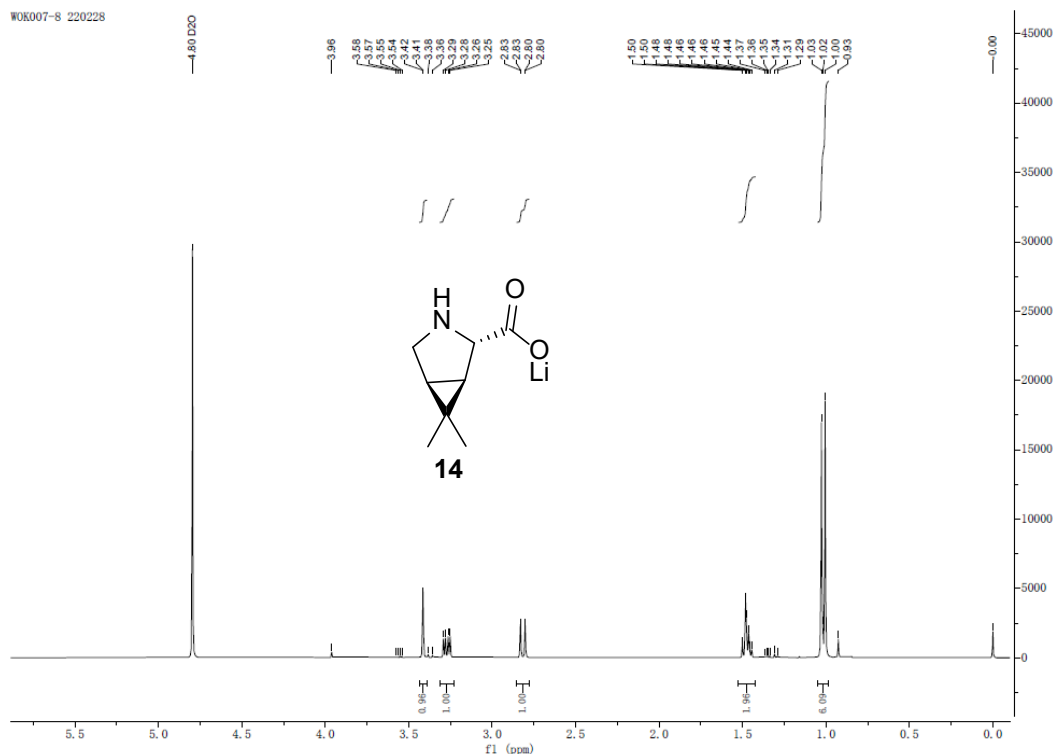

### 1.1.3 <sup>13</sup>C NMR (DMSO-d6)

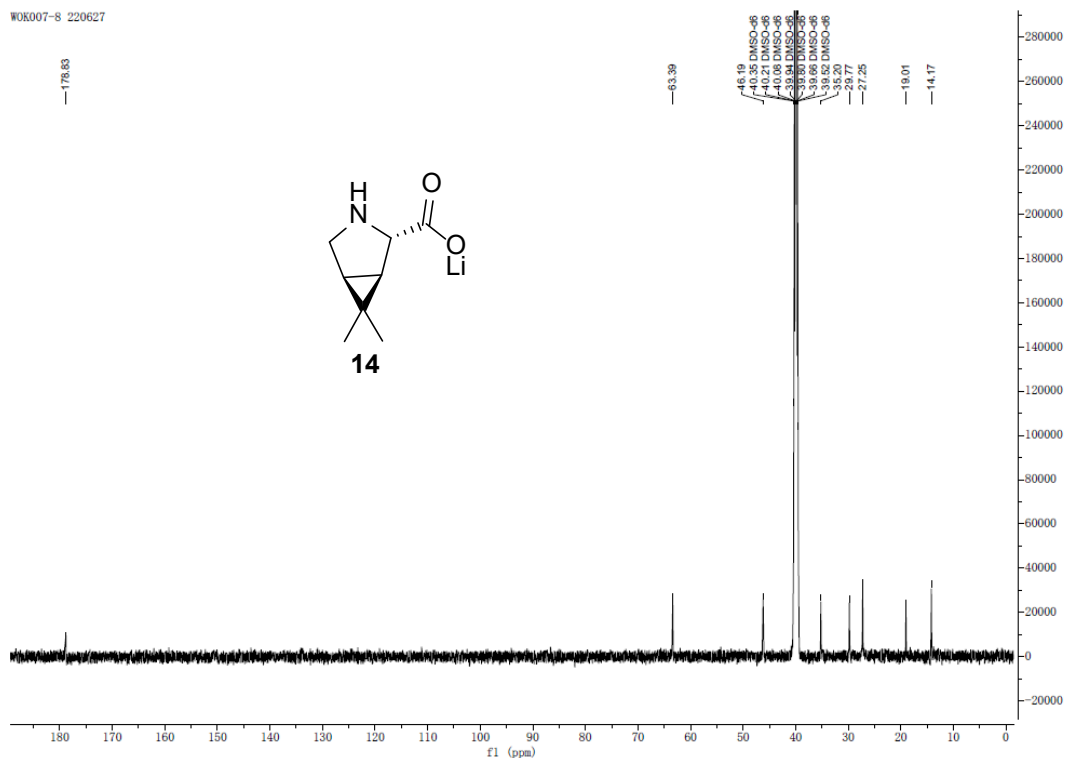

## 1.2 HPLC, HRMS, and NMR spectra of Compound 8

### 1.2.1 HPLC

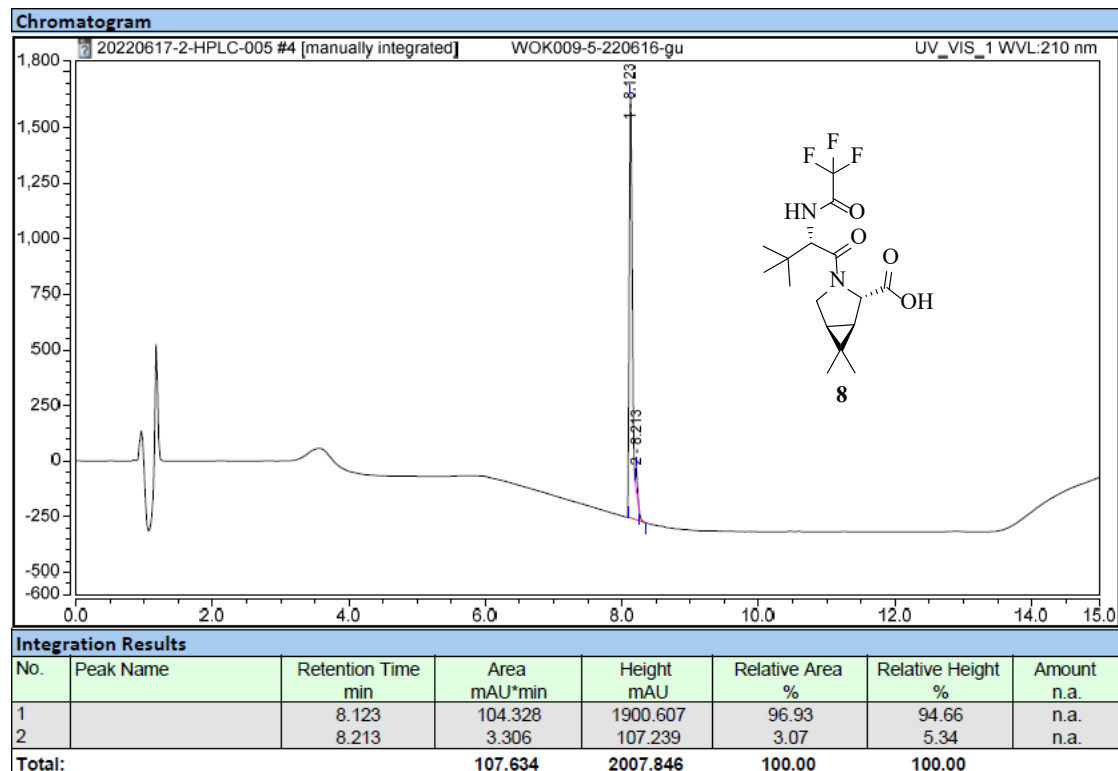

### 1.2.2 HRMS



## 1.2.4 $^{13}\text{C}$ NMR (DMSO-d6)

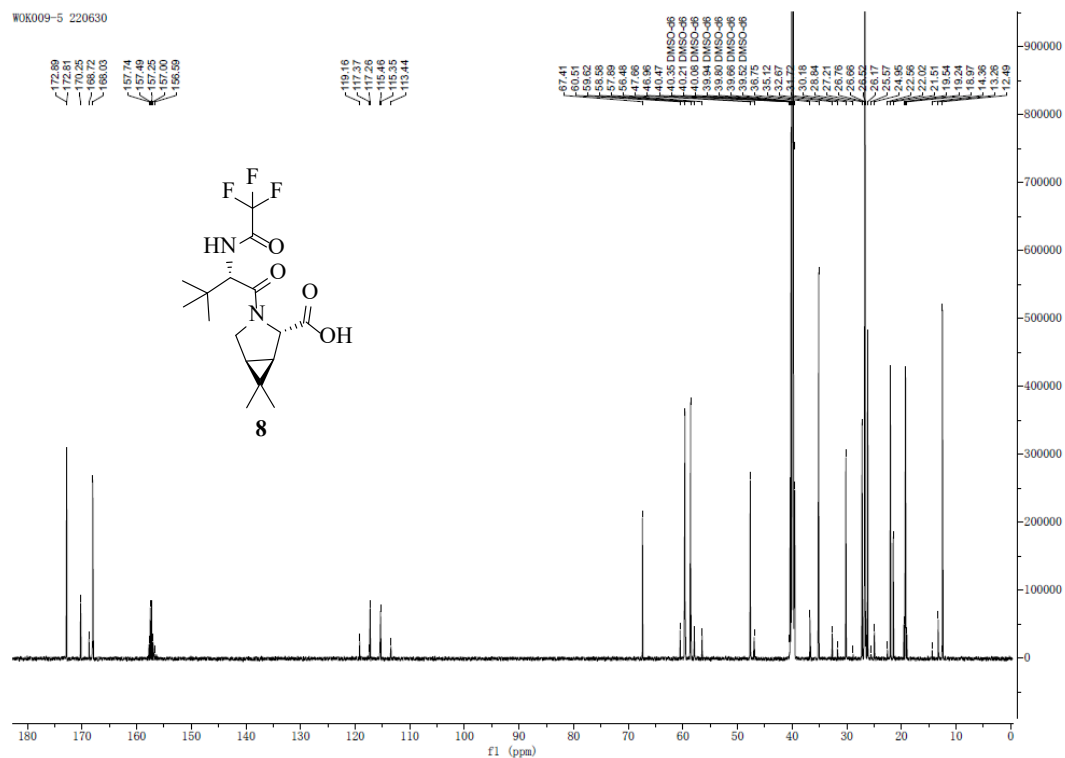

## 1.2.5 SXR

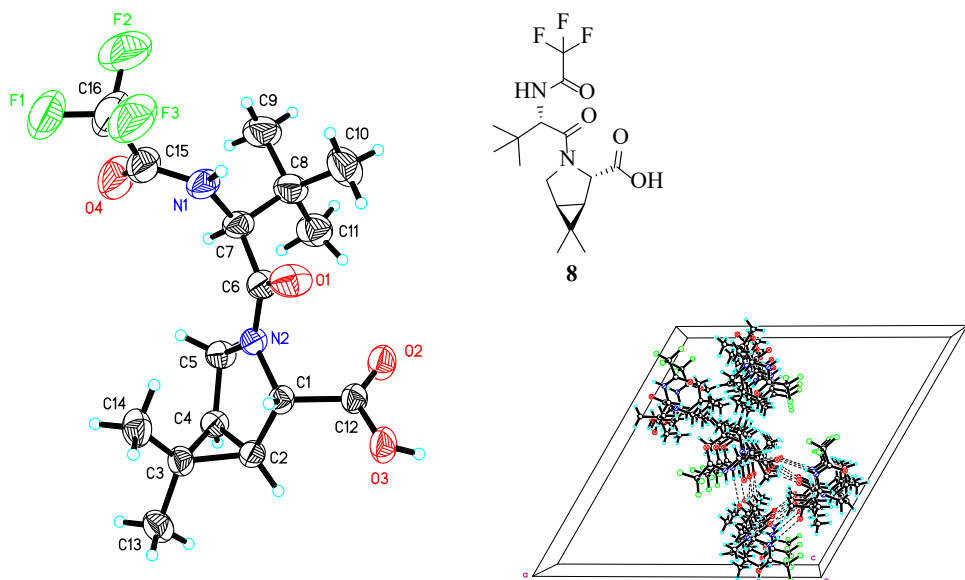

Table 1. Crystal data and structure refinement for cu\_d8v22277\_0m.

Identification code

cu\_d8v22277\_0m

Empirical formula

C<sub>16.33</sub> H<sub>24.33</sub> F<sub>3</sub> N<sub>2</sub> O<sub>4.33</sub>

|                                   |                                             |           |
|-----------------------------------|---------------------------------------------|-----------|
| Formula weight                    | 375.04                                      |           |
| Temperature                       | 293(2) K                                    |           |
| Wavelength                        | 1.54178 Å                                   |           |
| Crystal system                    | Trigonal                                    |           |
| Space group                       | R 3 :H                                      |           |
| Unit cell dimensions              | a = 23.7973(8) Å                            | a = 90°.  |
|                                   | b = 23.7973(8) Å                            | b = 90°.  |
|                                   | c = 10.5714(4) Å                            | g = 120°. |
| Volume                            | 5184.6(4) Å <sup>3</sup>                    |           |
| Z                                 | 9                                           |           |
| Density (calculated)              | 1.081 Mg/m <sup>3</sup>                     |           |
| Absorption coefficient            | 0.806 mm <sup>-1</sup>                      |           |
| F(000)                            | 1782                                        |           |
| Crystal size                      | 0.200 x 0.150 x 0.120 mm <sup>3</sup>       |           |
| Theta range for data collection   | 7.061 to 67.388°.                           |           |
| Index ranges                      | -26<=h<=28, -28<=k<=25, -12<=l<=12          |           |
| Reflections collected             | 20262                                       |           |
| Independent reflections           | 4076 [R(int) = 0.0617]                      |           |
| Completeness to theta = 67.679°   | 98.2 %                                      |           |
| Absorption correction             | Semi-empirical from equivalents             |           |
| Max. and min. transmission        | 0.7533 and 0.4876                           |           |
| Refinement method                 | Full-matrix least-squares on F <sup>2</sup> |           |
| Data / restraints / parameters    | 4076 / 136 / 300                            |           |
| Goodness-of-fit on F <sup>2</sup> | 1.059                                       |           |
| Final R indices [I>2sigma(I)]     | R1 = 0.0565, wR2 = 0.1578                   |           |
| R indices (all data)              | R1 = 0.0593, wR2 = 0.1635                   |           |
| Absolute structure parameter      | 0.02(10)                                    |           |
| Extinction coefficient            | 0.0107(14)                                  |           |
| Largest diff. peak and hole       | 0.218 and -0.174 e.Å <sup>-3</sup>          |           |

## 1.3 HPLC data, HRMS, and NMR of Compound 10

### 1.3.1.1 HPLC

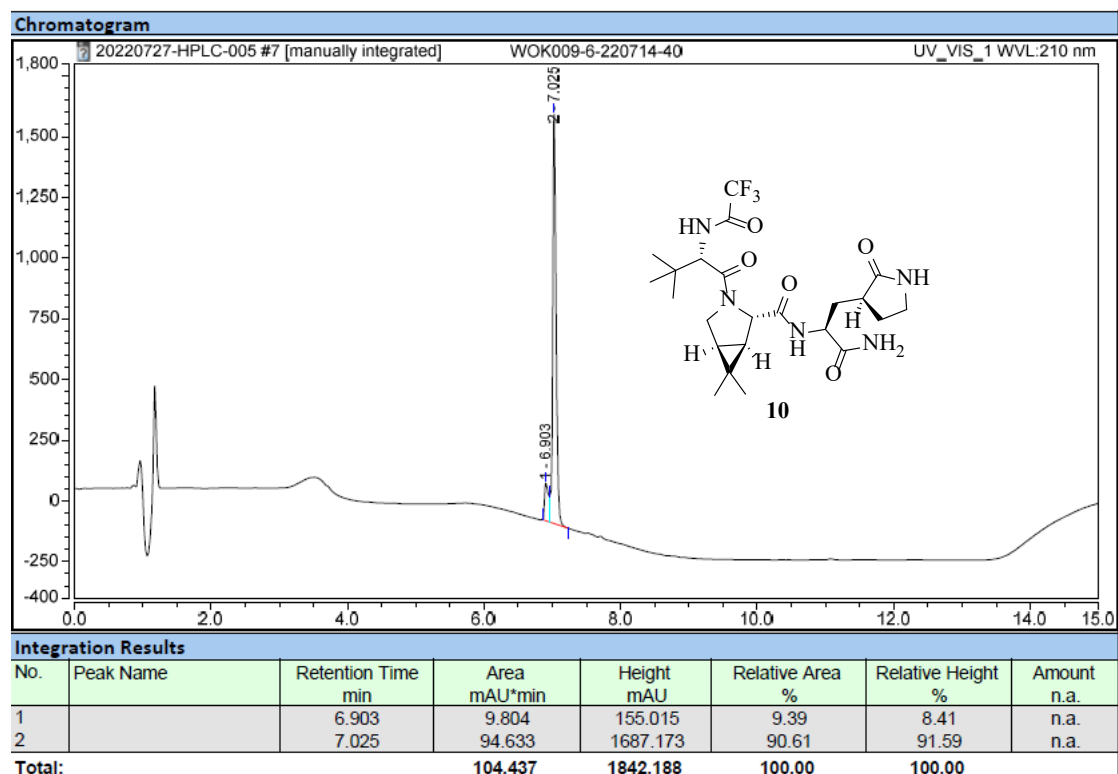

### 1.3.2 HRMS

## Qualitative Compound Report

|                        |                        |                    |                                                              |
|------------------------|------------------------|--------------------|--------------------------------------------------------------|
| <b>Data File</b>       | 20220729017-0729-027.d | <b>Sample Name</b> | WOK009-6                                                     |
| <b>Sample Type</b>     | Sample                 | <b>Position</b>    | Vial 87                                                      |
| <b>Instrument Name</b> | Instrument 1           | <b>Acq Method</b>  |                                                              |
| <b>DA Method</b>       | Default.M              | <b>Comment</b>     | lot:220714                                                   |
| <b>AcquiredTime</b>    | 7/29/2022 2:53:07 PM   | <b>DataFile</b>    | D:\MassHunter\Data\2022-07\2022-07-29\20220729017-0729-027.d |

#### Compound Table

| Compound Label          | RT    | Mass     | Abund  | Formula          | Tgt Mass | Diff (ppm) |
|-------------------------|-------|----------|--------|------------------|----------|------------|
| Cpd 1: C23 H34 F3 N5 O5 | 0.144 | 517.2525 | 194751 | C23 H34 F3 N5 O5 | 517.2512 | 2.43       |

| Compound Label          | RT    | Algorithm       | Mass     |
|-------------------------|-------|-----------------|----------|
| Cpd 1: C23 H34 F3 N5 O5 | 0.144 | Find By Formula | 517.2525 |

#### MS Zoomed Spectrum

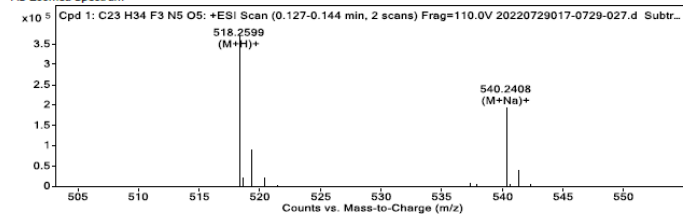

#### MS Spectrum Peak List

| m/z      | Calc m/z | Diff(ppm) | Abund  | Formula             | Ion     |
|----------|----------|-----------|--------|---------------------|---------|
| 518.2599 | 518.2585 | 2.7       | 373635 | C23 H35 F3 N5 O5    | (M+H)+  |
| 540.2408 | 540.2404 | 0.67      | 194751 | C23 H34 F3 N5 Na O5 | (M+Na)+ |

--- End Of Report ---

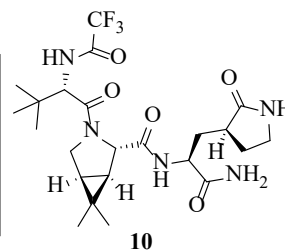



### 1.3.3 <sup>1</sup>H NMR(DMSO-d6)

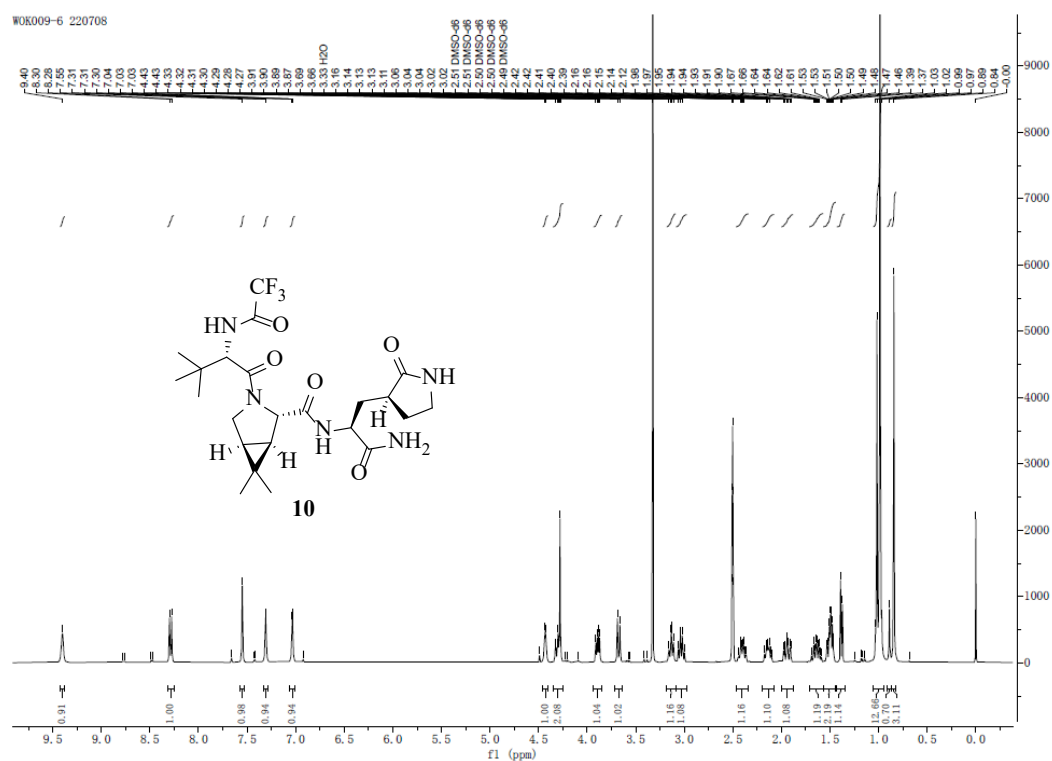

### 1.3.4 <sup>13</sup>C NMR(DMSO-d6)

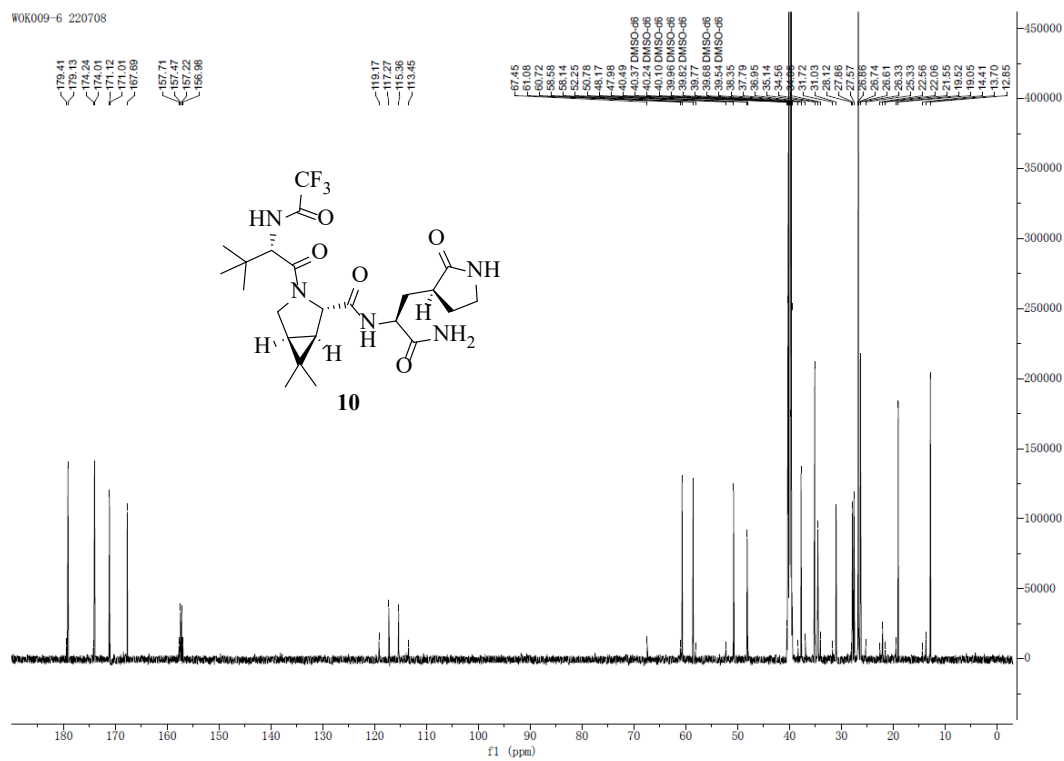

### 1.3.5 <sup>1</sup>H NMR(DMSO-d6)

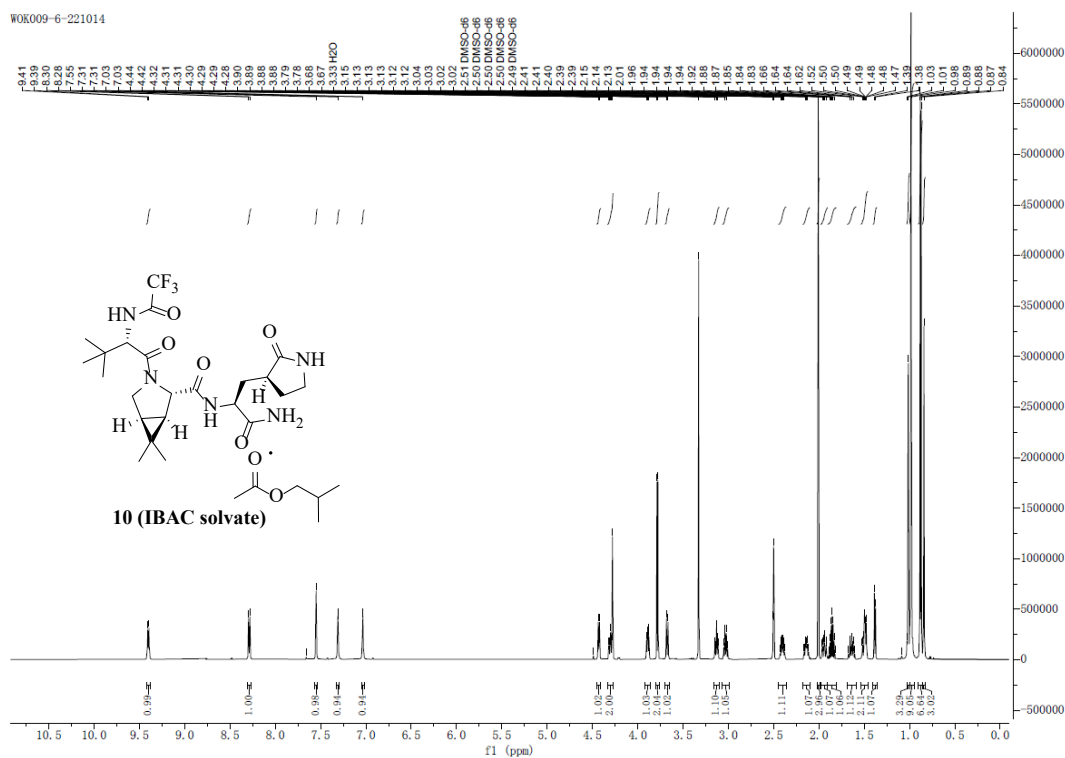

### 1.3.6 <sup>13</sup>C NMR(DMSO-d6)

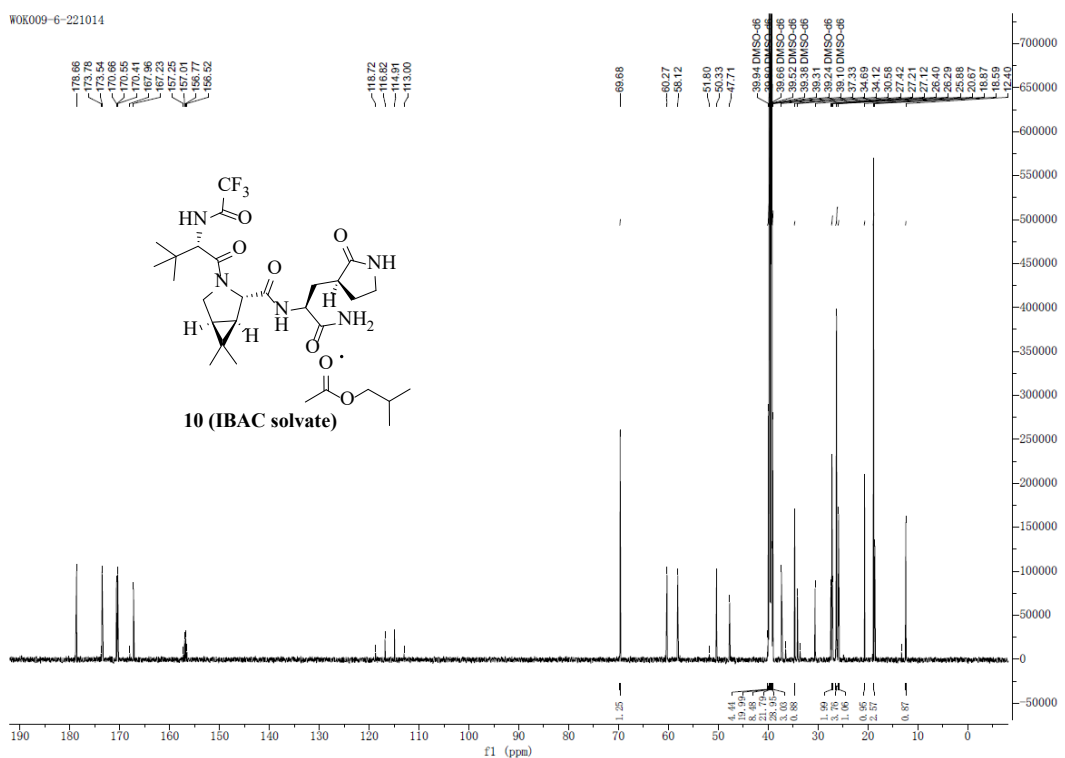

### 1.3.7 XRPD

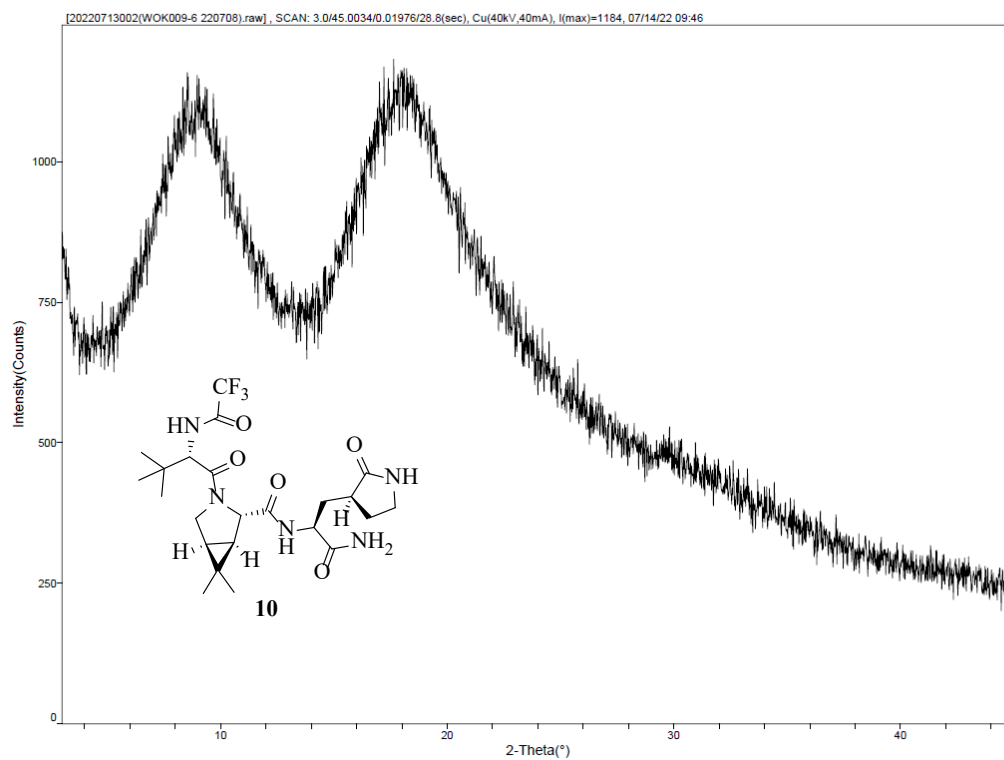

### 1.3.8 XRPD

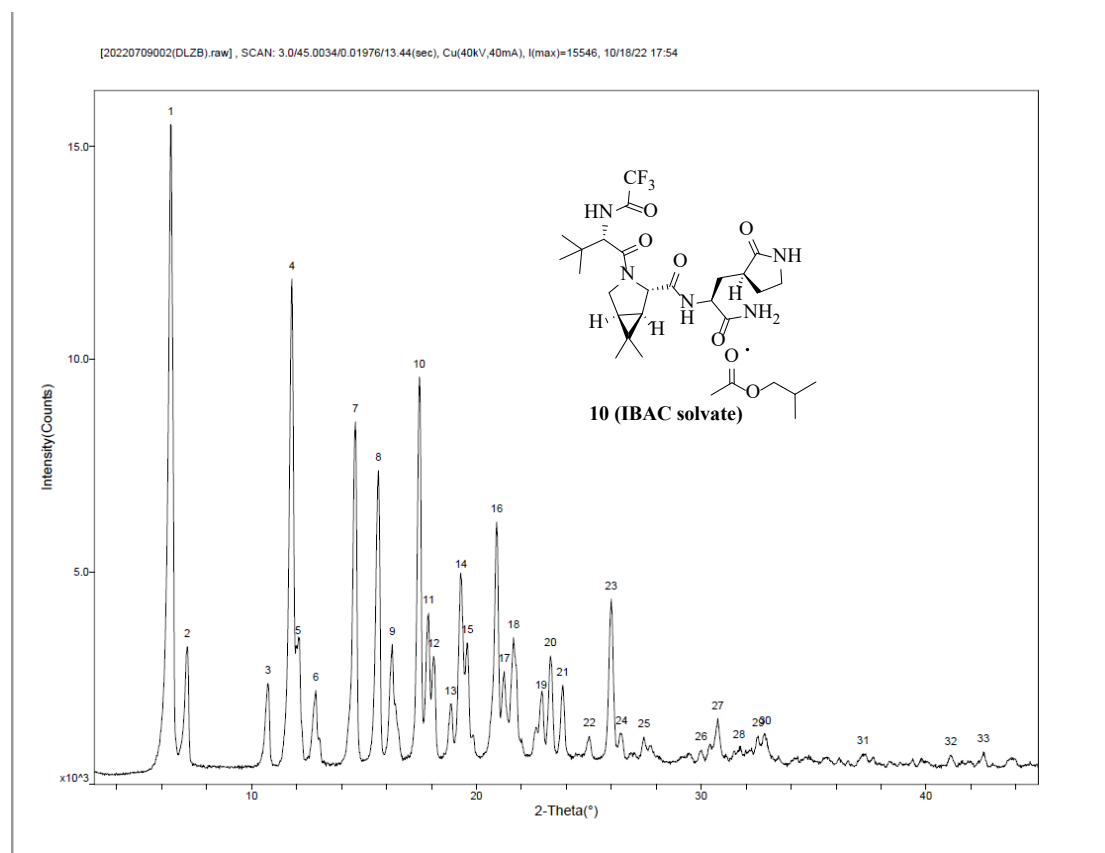

### 1.3.9 DSC

Sample: 20220709002 DLZB  
Size: 1.2700 mg  
Method: Normal Method-N2

DSC

File: C:\ATA\Data\DSC\202210\20220709002.002  
Operator: XUXIAOYAN  
Run Date: 18-Oct-2022 22:37  
Instrument: DSC Q2000 V24.10 Build 122

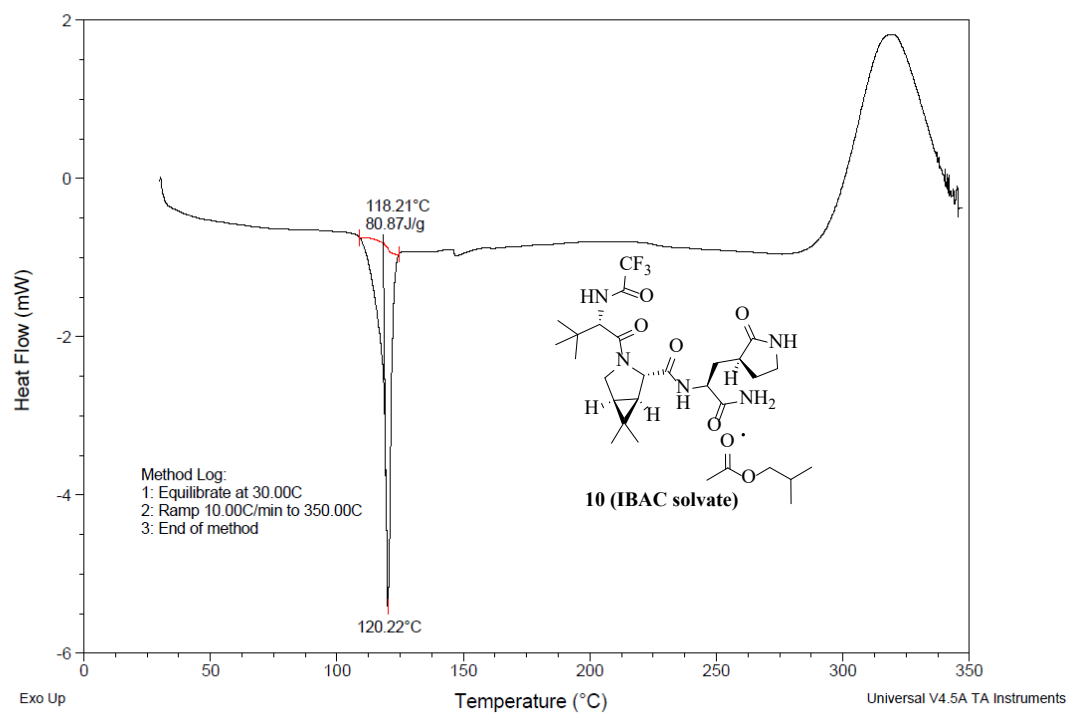

### 1.3.10 TGA

Sample: 20220709002 DLZB  
Size: 5.0890 mg  
Method: Normal Method-N2

TGA

File: C:\...TGA\202210\20220709002 (2).001  
Operator: XUXIAOYAN  
Run Date: 18-Oct-2022 19:19  
Instrument: TGA Q500 V20.13 Build 39

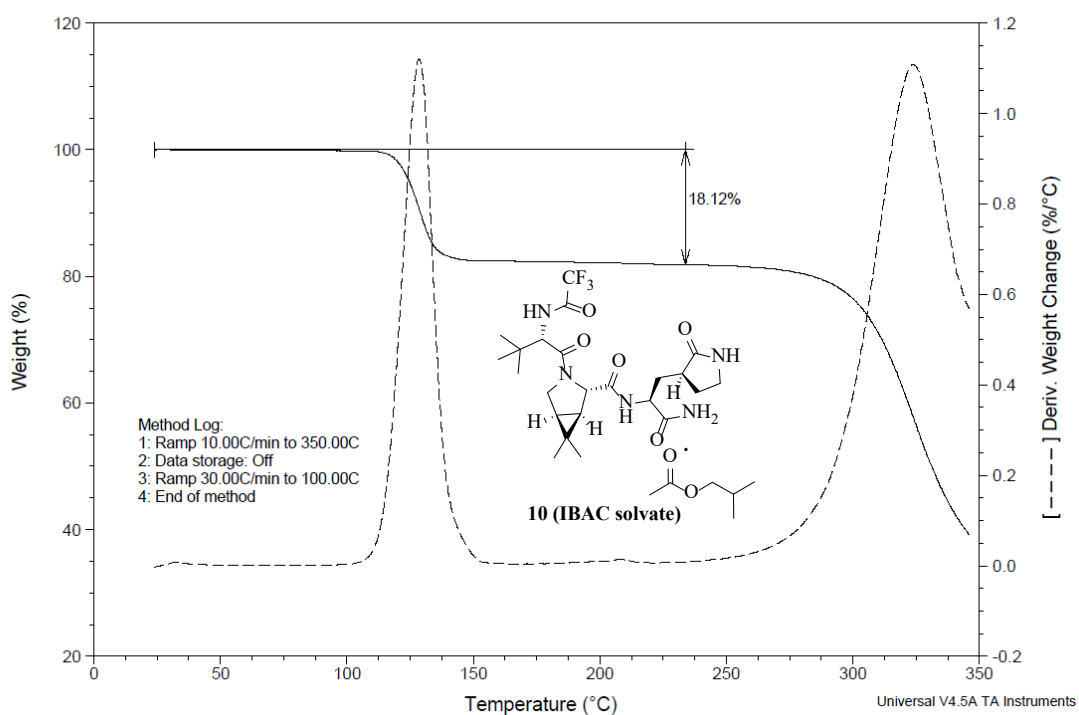

## 1.3.11 SXR

## cu\_20221245\_0m

**Table 1 Crystal data and structure refinement for cu\_20221245\_0m.**

|                                             |                                                                              |  |
|---------------------------------------------|------------------------------------------------------------------------------|--|
| Identification code                         | cu_20221245_0m                                                               |  |
| Empirical formula                           | C <sub>29</sub> H <sub>46</sub> F <sub>3</sub> N <sub>5</sub> O <sub>7</sub> |  |
| Formula weight                              | 633.71                                                                       |  |
| Temperature/K                               | 170.00                                                                       |  |
| Crystal system                              | triclinic                                                                    |  |
| Space group                                 | P1                                                                           |  |
| a/Å                                         | 14.6382(13)                                                                  |  |
| b/Å                                         | 8.7434(8)                                                                    |  |
| c/Å                                         | 14.8811(14)                                                                  |  |
| α/°                                         | 90.011(2)                                                                    |  |
| β/°                                         | 112.727(4)                                                                   |  |
| γ/°                                         | 90.015(3)                                                                    |  |
| Volume/Å <sup>3</sup>                       | 1756.7(3)                                                                    |  |
| Z                                           | 2                                                                            |  |
| ρ <sub>calc</sub> /cm <sup>3</sup>          | 1.198                                                                        |  |
| μ/mm <sup>-1</sup>                          | 0.811                                                                        |  |
| F(000)                                      | 676.0                                                                        |  |
| Crystal size/mm <sup>3</sup>                | 0.15 × 0.13 × 0.12                                                           |  |
| Radiation                                   | CuKα (λ = 1.54184)                                                           |  |
| 2θ range for data collection/°              | 6.44 to 149.72                                                               |  |
| Index ranges                                | -18 ≤ h ≤ 18, -10 ≤ k ≤ 10, -18 ≤ l ≤ 18                                     |  |
| Reflections collected                       | 33066                                                                        |  |
| Independent reflections                     | 13052 [R <sub>int</sub> = 0.0484, R <sub>sigma</sub> = 0.0519]               |  |
| Data/restraints/parameters                  | 13052/329/905                                                                |  |
| Goodness-of-fit on F <sup>2</sup>           | 1.047                                                                        |  |
| Final R indexes [I > 2σ (I)]                | R <sub>1</sub> = 0.0428, wR <sub>2</sub> = 0.1071                            |  |
| Final R indexes [all data]                  | R <sub>1</sub> = 0.0488, wR <sub>2</sub> = 0.1148                            |  |
| Largest diff. peak/hole / e Å <sup>-3</sup> | 0.44/-0.20                                                                   |  |
| Flack parameter                             | 0.17(7)                                                                      |  |

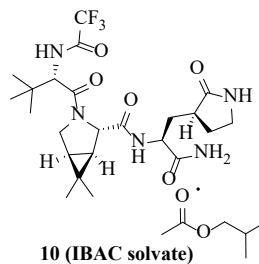

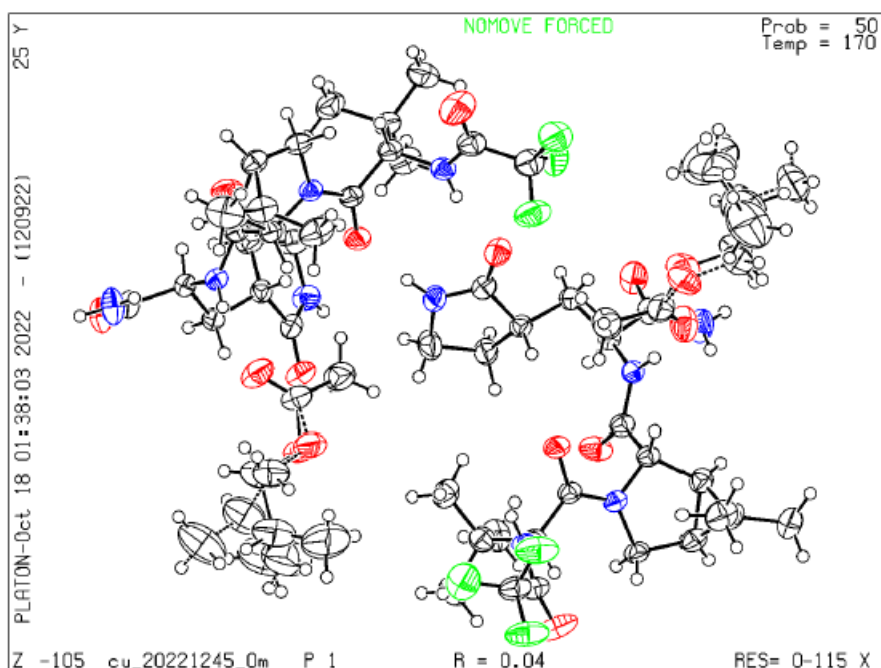

## 2. HPLC, HRMS, and NMR Spectra of Nirmatrelvir (1)

### 2.1 HPLC, HRMS, NMR of nirmatrelvir (1)

#### 2.1.1 HPLC data

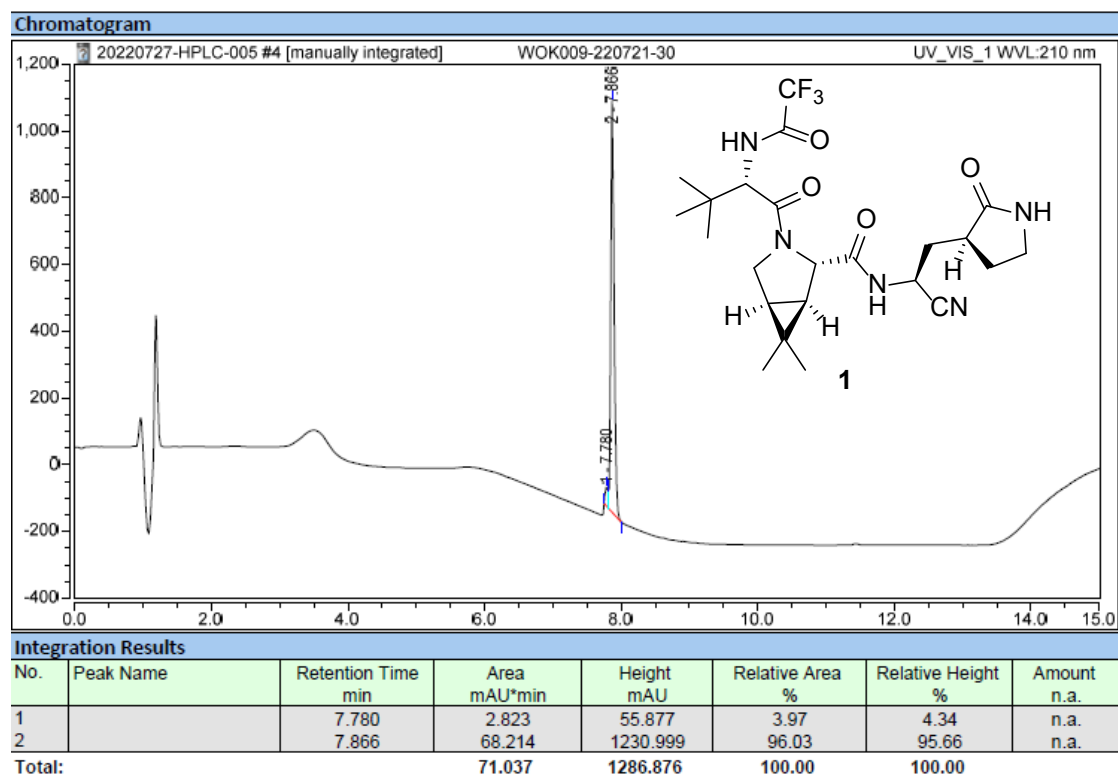

## 2.1.2 HRMS

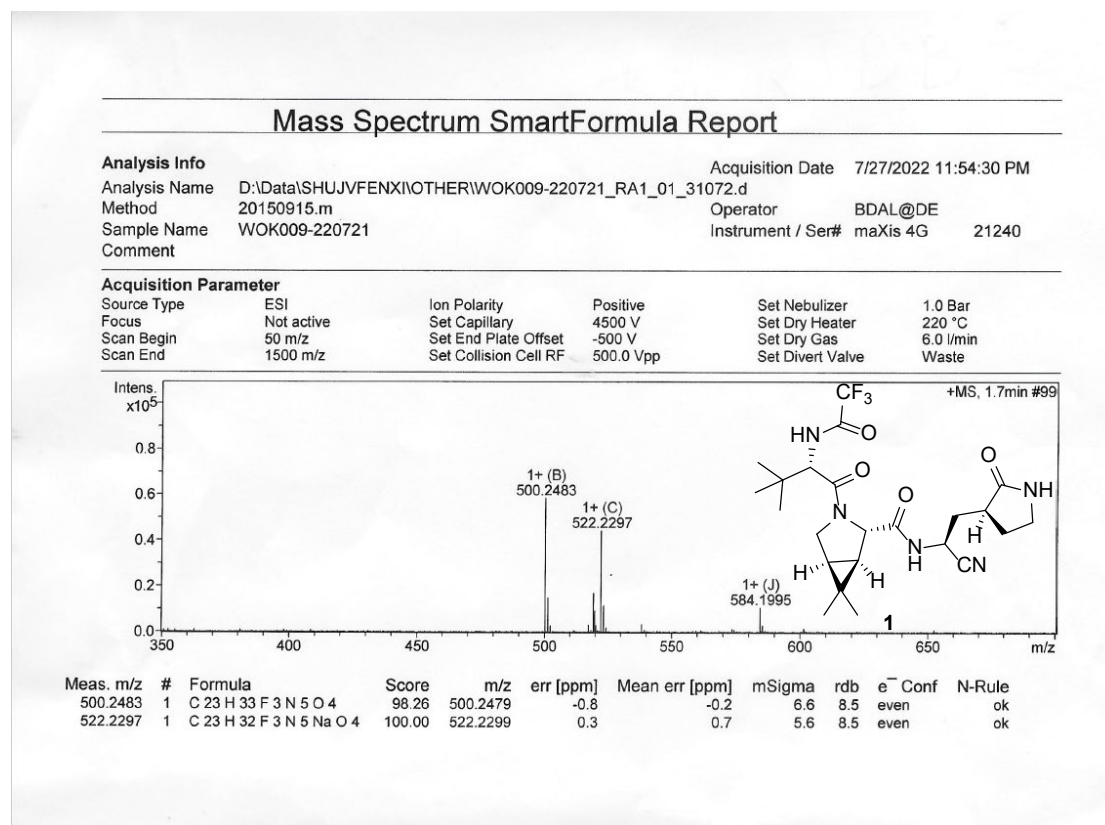

## 2.1.3 <sup>1</sup>H NMR ((DMSO-d6))

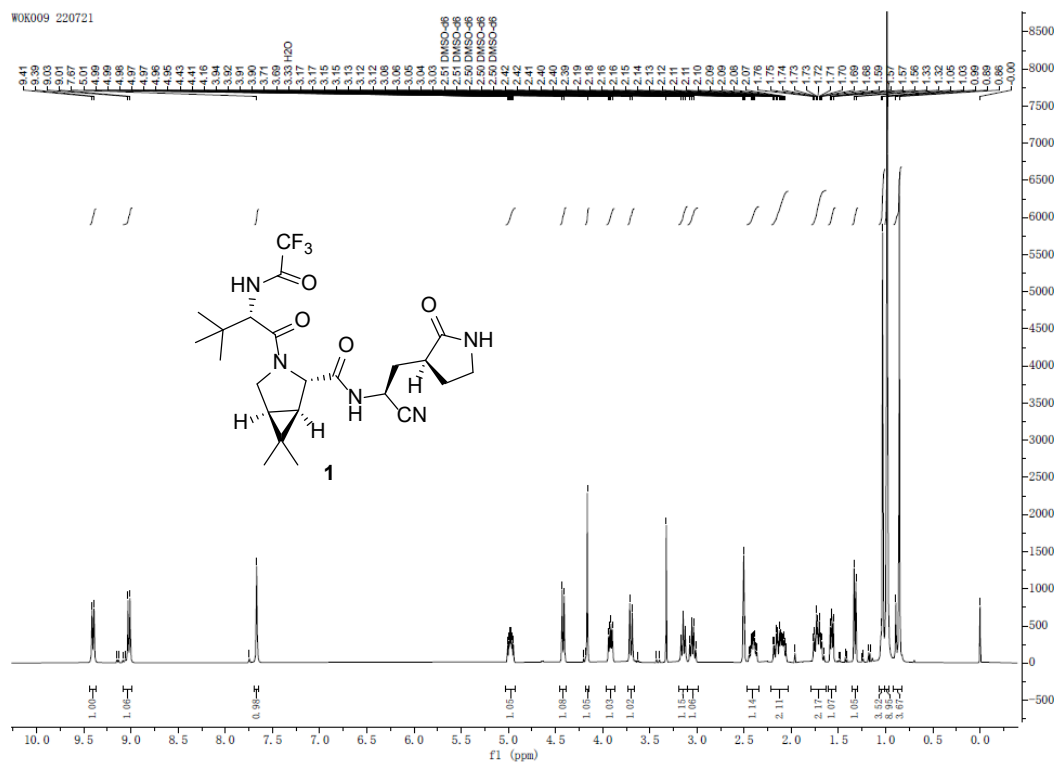

## 2.1.4 $^1\text{H}$ NMR ((DMSO-d<sub>6</sub>-40°C)

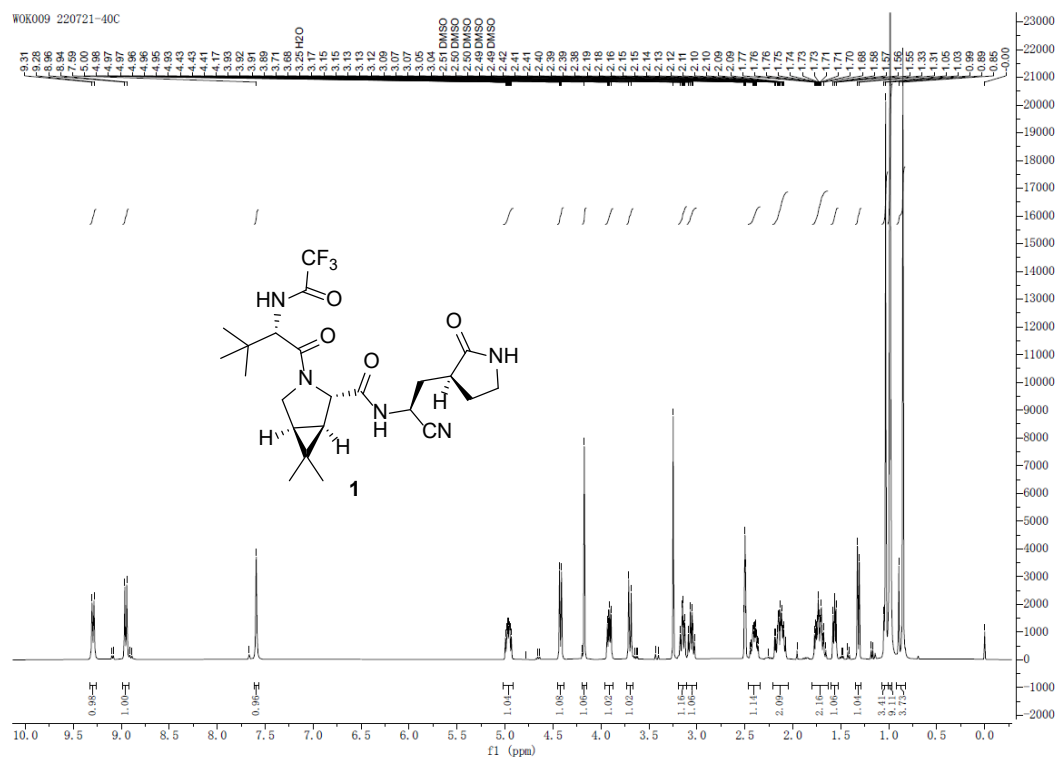

## 2.1.5 $^1\text{H}$ NMR ((DMSO-d<sub>6</sub>-60°C)

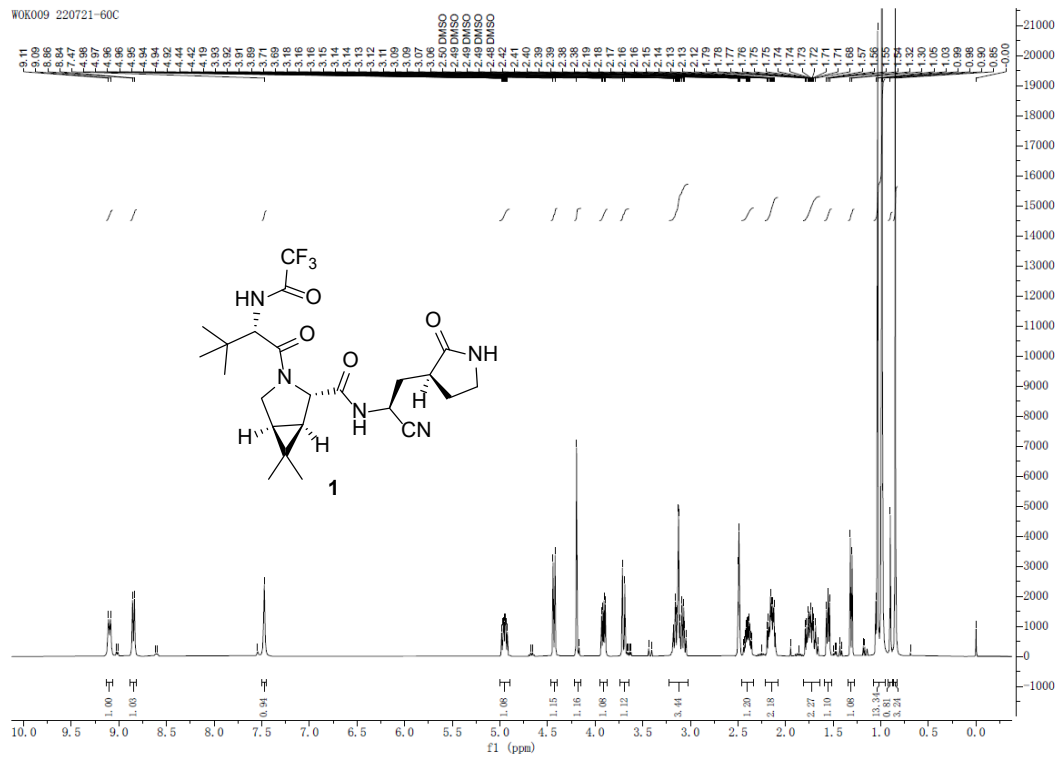



## 2.1.6 $^1\text{H}$ NMR ( $\text{CDCl}_3$ )

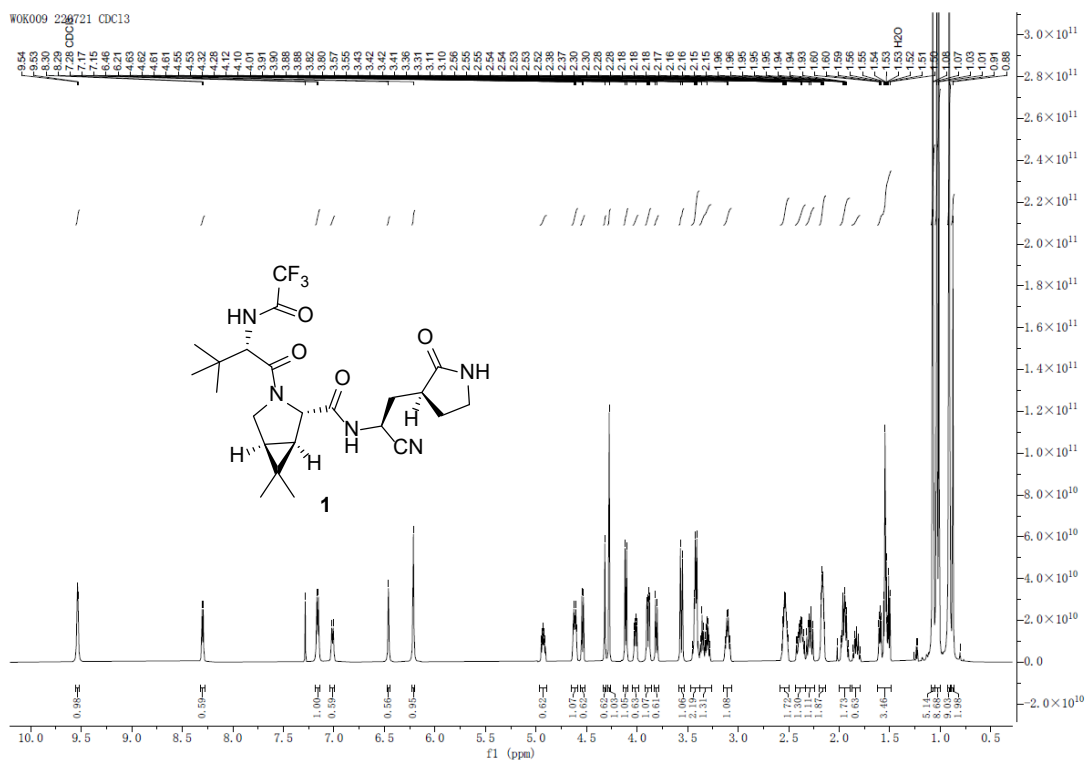

## 2.1.7 $^1\text{H}$ NMR ( $\text{CD}_3\text{OD}$ )

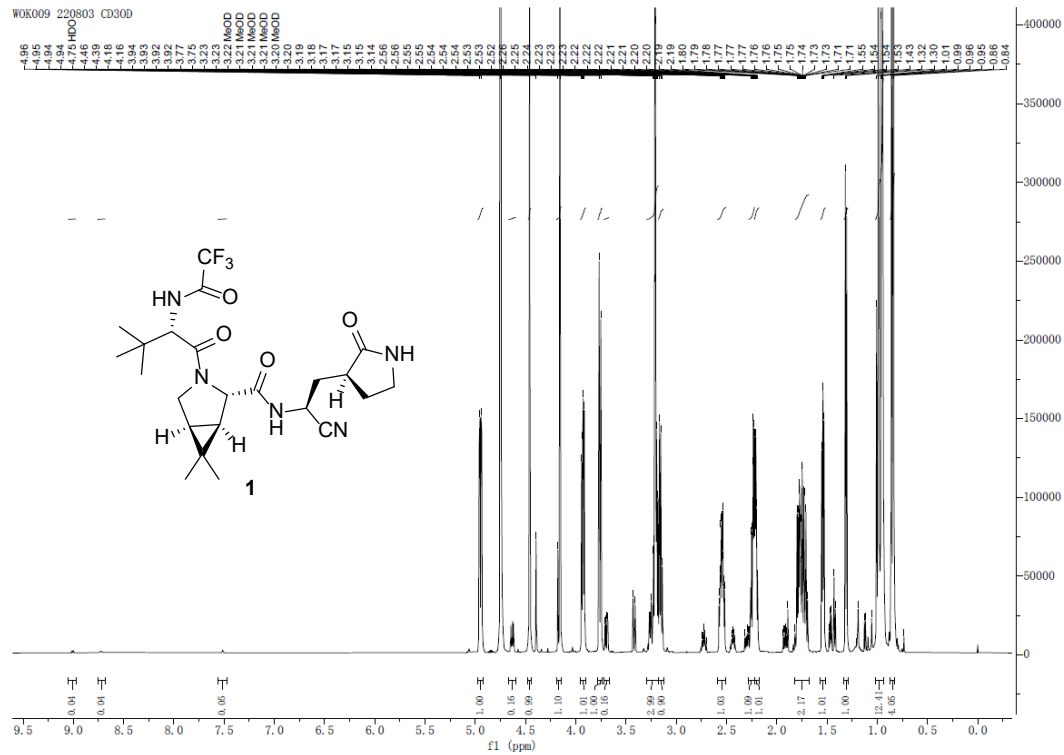

## 2.1.8 <sup>13</sup>C NMR (DMSO-d6)

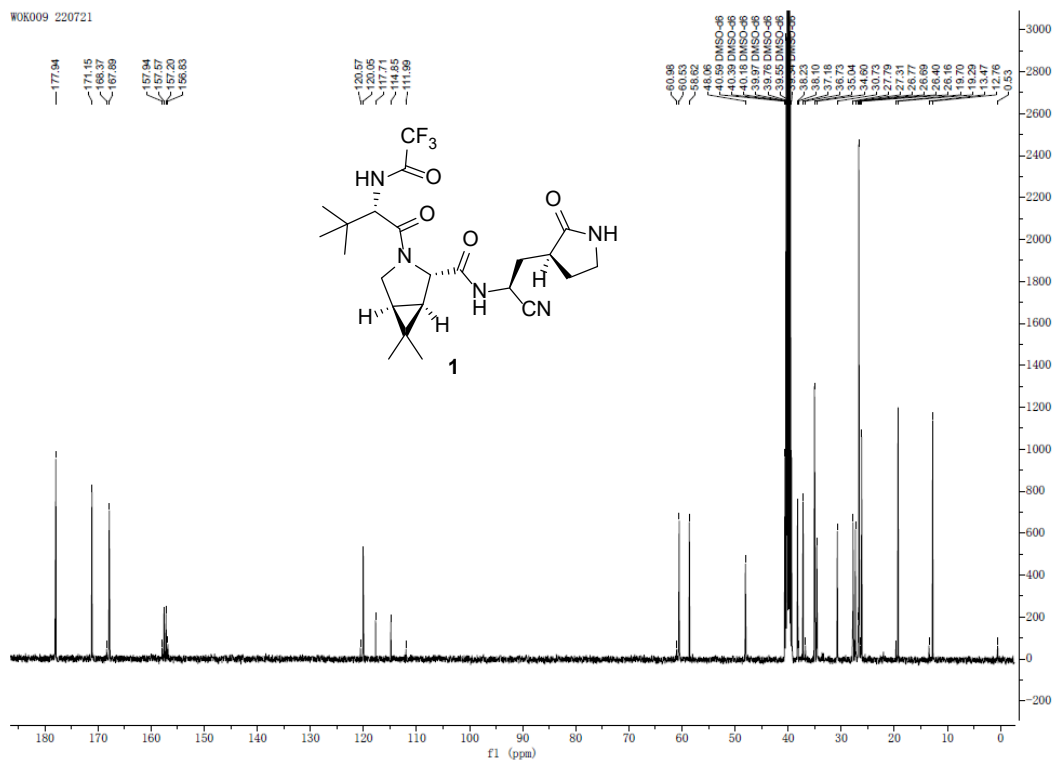

## 2.1.9 DEPT NMR (DMSO-d6)

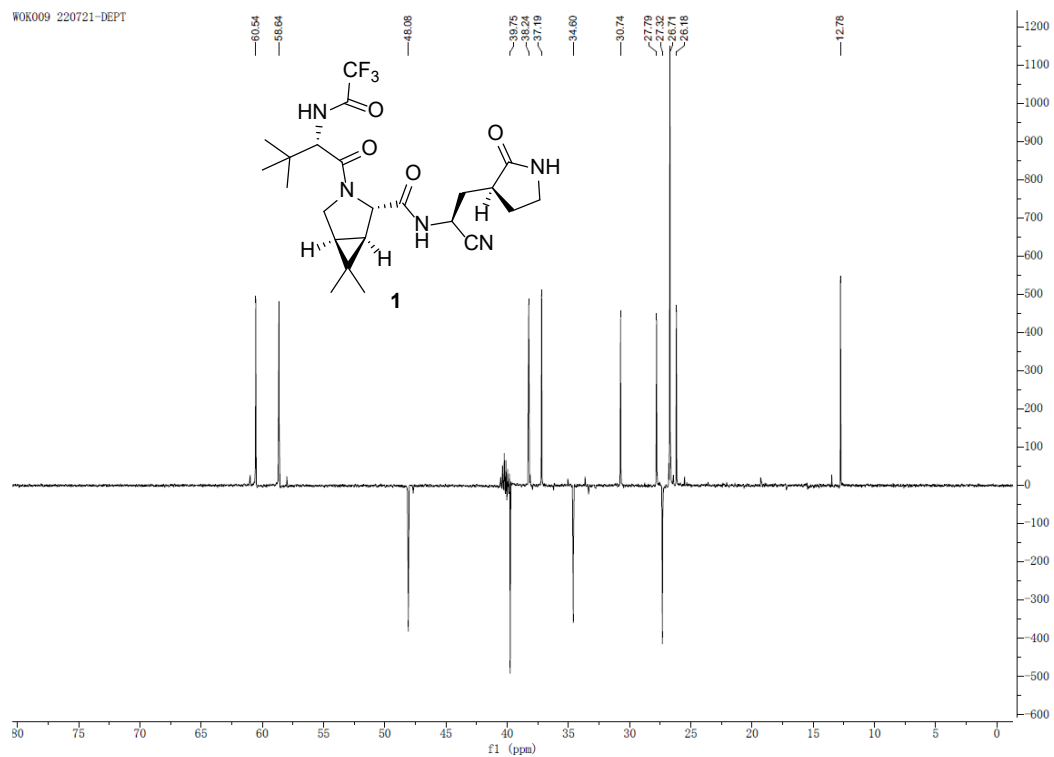

### 2.1.10 $^1\text{H}$ - $^1\text{H}$ COSY (DMSO-d6)

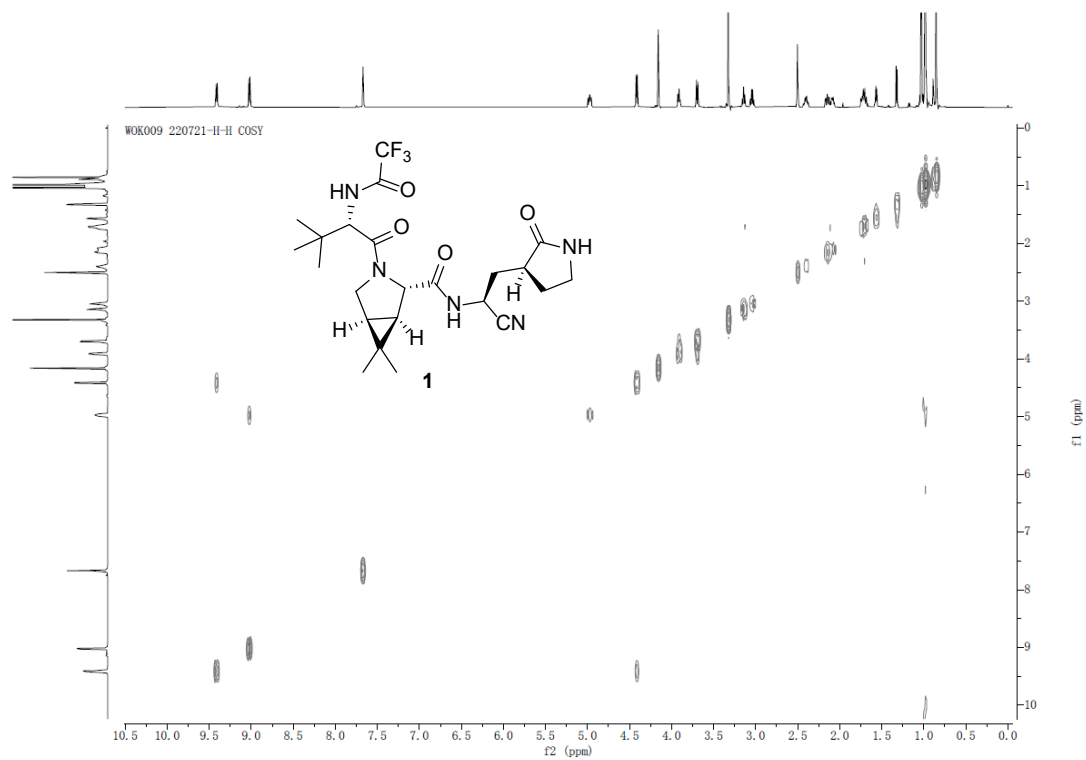

### 2.1.11 HSQC (DMSO-d6)

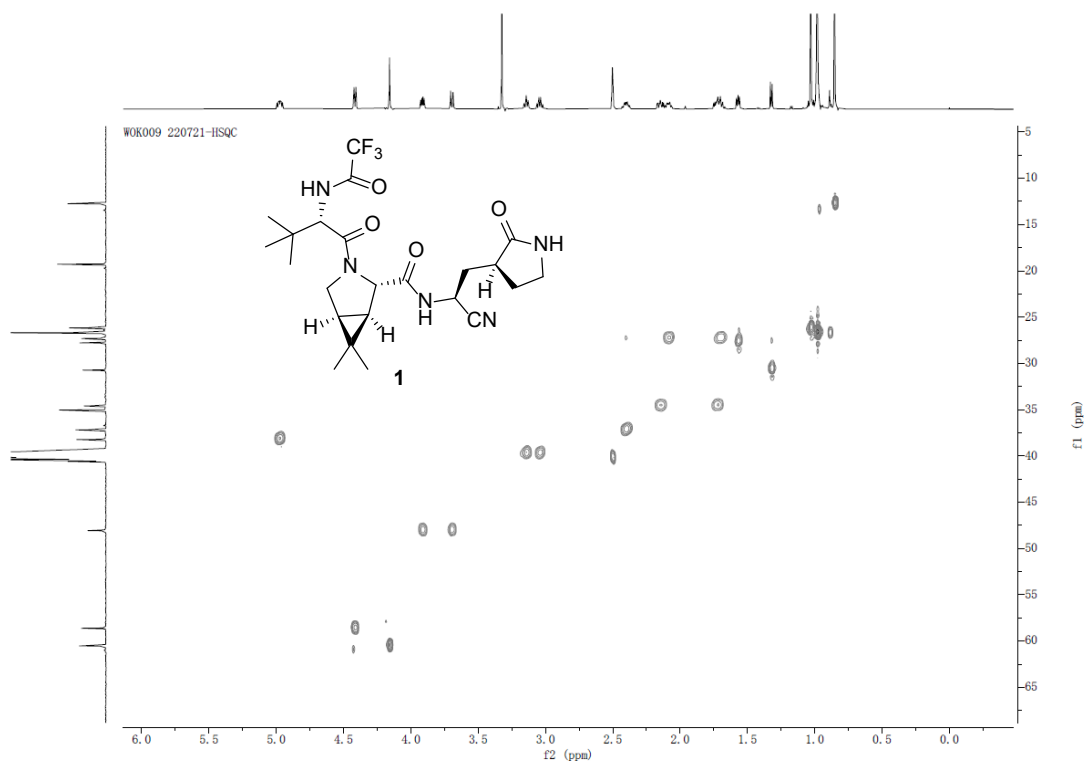

## 2.1.12 HMBC (DMSO-d6)

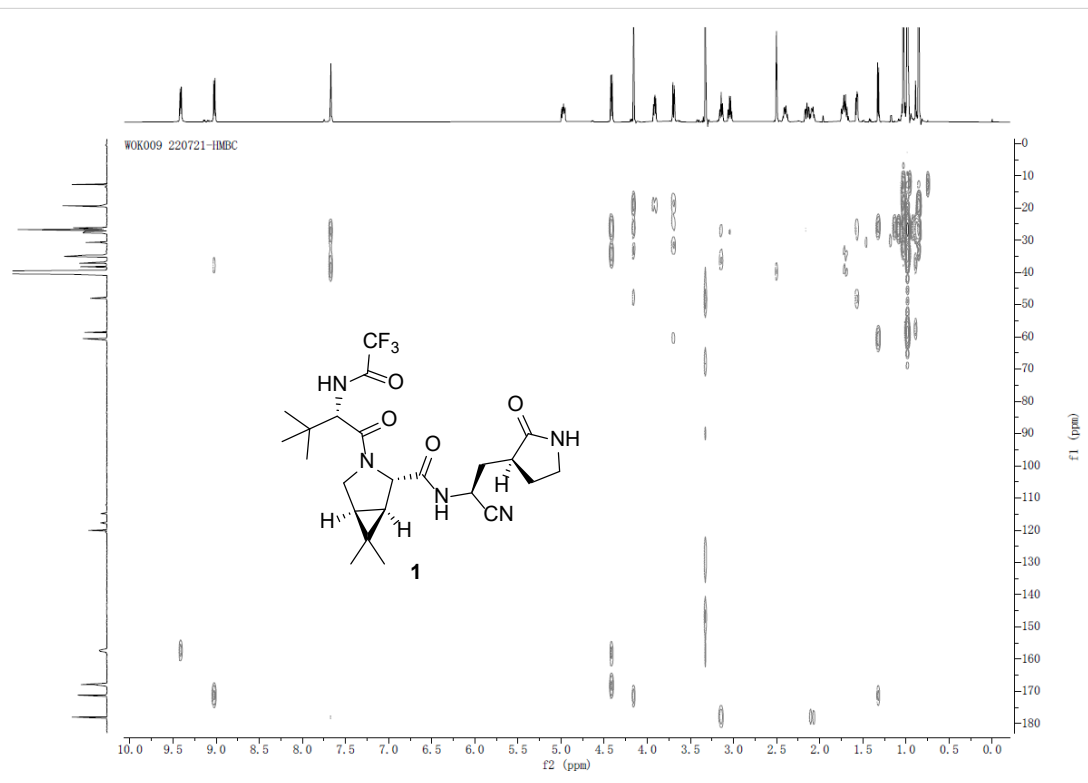

## 2.2 UV, FT-IR (KBr), DSC, TGA, PXRD of Nirmatrelvir (1)

### 2.2.1 UV

20220804027\_144307 - RawData

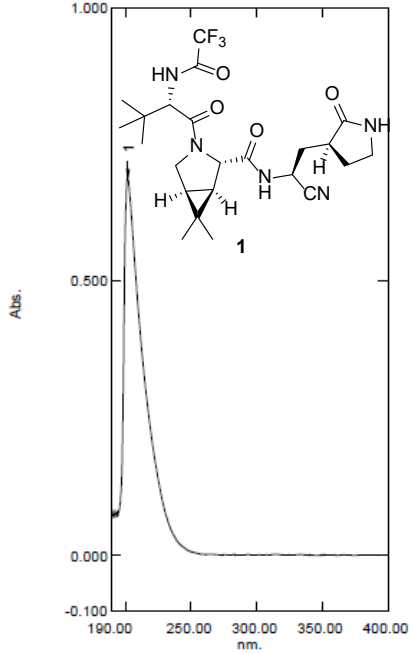

| No. | P/V | Wavelength | Abs.  | Description |
|-----|-----|------------|-------|-------------|
| 1   |     | 202.10     | 0.691 |             |

Software Information  
 Software Name: UVProbe  
 Version: 2.52  
 Mode: LabSolutions

Data Information  
 Data is: Original  
 Analyst: hanru  
 Date/Time: 08/10/2022 02:45:15 PM  
 Comments:

Instrument Information  
 Instrument Name: ACQ-3F-010  
 Instrument Type: UV-2600 Series  
 Model (S/N): UV-2600 (A11665000543)

[Measurement Properties]  
 Wavelength Range (nm.): 190.00 to 400.00  
 Scan Speed: Fast  
 Sampling Interval: 0.1  
 Auto Sampling Interval: Disabled  
 Scan Mode: Auto

[Instrument Properties]  
 Instrument Type: UV-2600 Series  
 Measuring Mode: Absorbance  
 Slit Width: 2.0  
 Accumulation time: 0.1 sec.  
 Light Source Change Wavelength: 313.0 nm  
 Detector Unit: Direct  
 S/R Exchange: Normal  
 Stair Correction: OFF

[Attachment Properties]  
 Attachment: None

[Operation]  
 Threshold: 0.0100000  
 Points: 4  
 InterPolate: Disabled  
 Average: Disabled

[Sample Preparation Properties]  
 Weight: 13.03mg  
 Volume: 25ml  
 Dilution: 25  
 Path Length:  
 Additional Information: Sample name:WOK009  
 Lot:220721  
 No:20220804027  
 Solvent:Methanol

## 2.2.2 FT-IR (KBr)

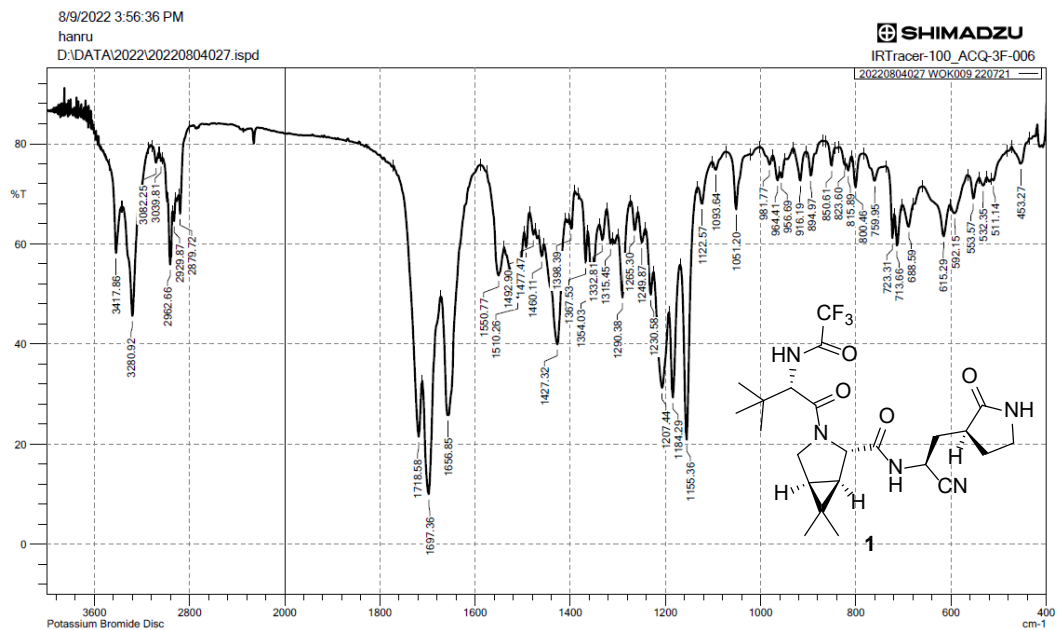

## 2.2.3 DSC

Sample: WOK009 220721  
Size: 1.0900 mg  
Method: Normal Method-N2

DSC

File: C:\TA\Data\DSC\202208\20220729074.001  
Operator: XUXIAOYAN  
Run Date: 01-Aug-2022 20:41  
Instrument: DSC Q2000 V24.10 Build 122

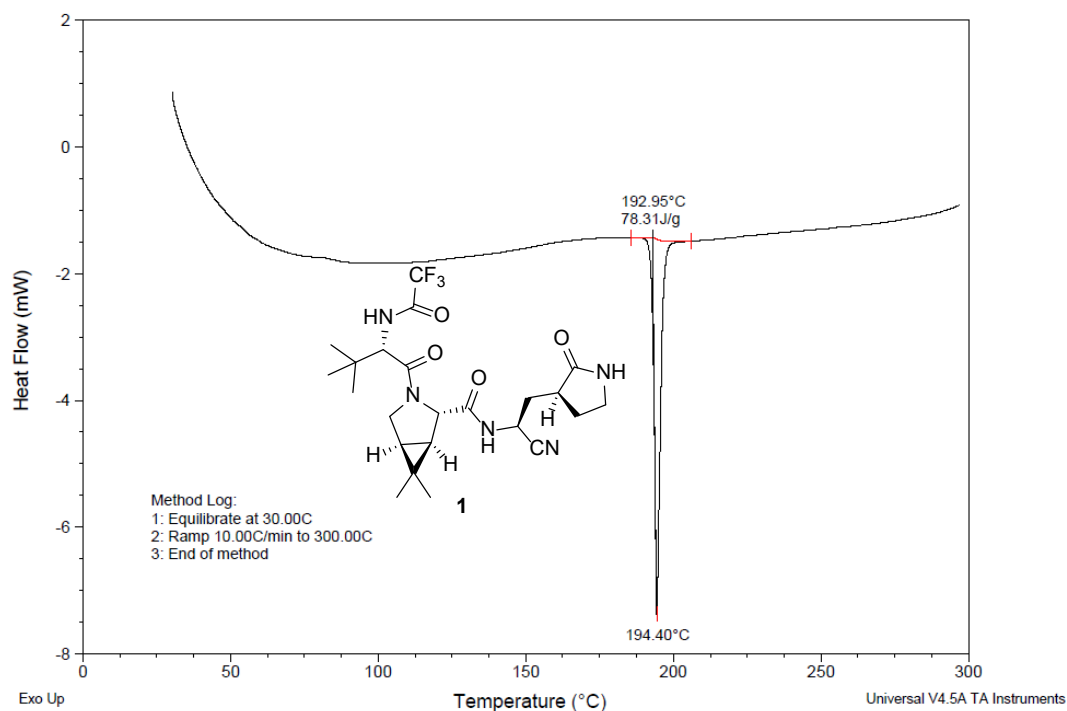

## 2.2.4 TGA

Sample: WOK009 220721  
Size: 6.6420 mg  
Method: Normal Method-N2

TGA

File: C:\TA\Data\TGA\202208\20220729074.001  
Operator: XUXIAOYAN  
Run Date: 01-Aug-2022 18:09  
Instrument: TGA Q500 V20.13 Build 39

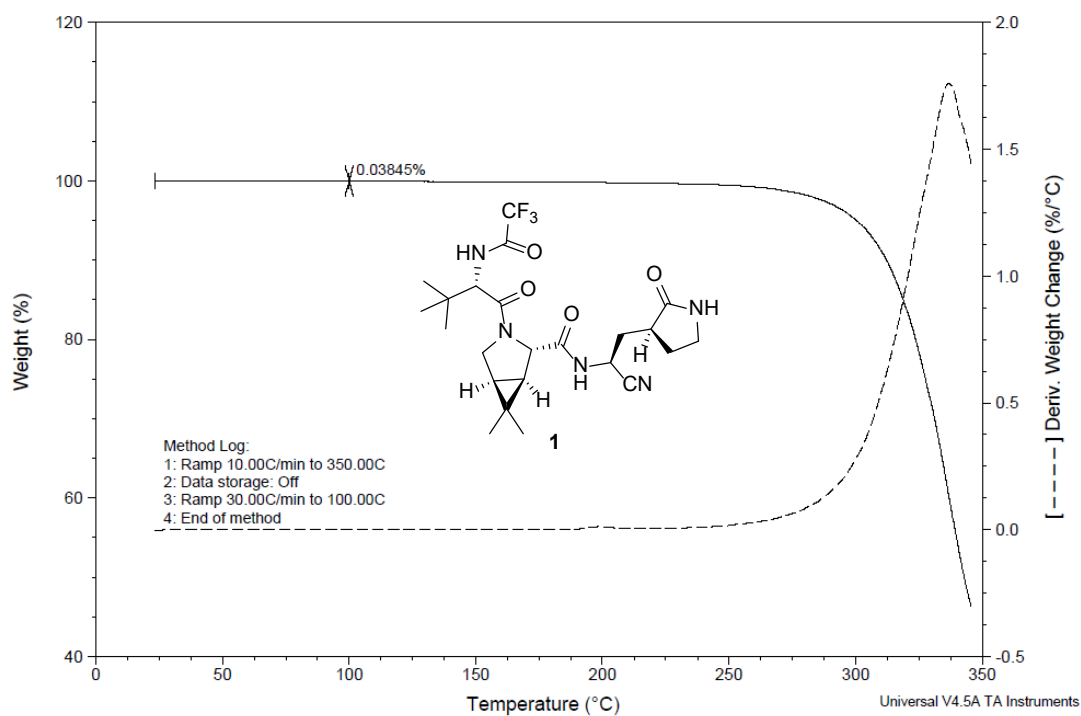

## 2.2.5 XRPD

7/25/2022 6:08:00 PM

20220725061(WOK009 220721) /3.000/44.992/0.020/0.15s/40.0kV/40.0mA

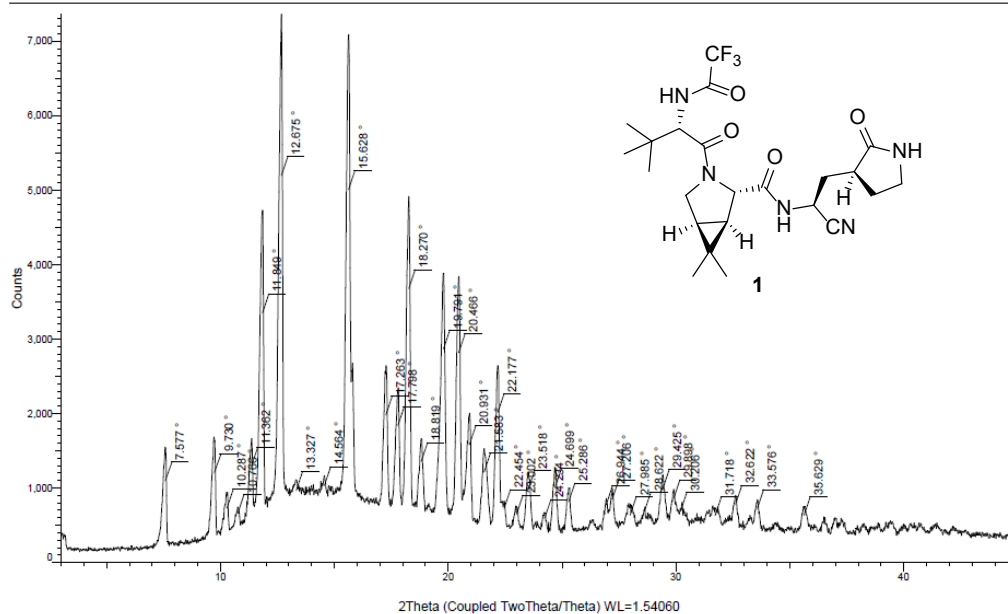

7/25/2022 6:08:00 PM

20220725061(WOK009 220721)  
3.000/44.992/0.020/0.15s/40.0kV/40.0mA

| Index | Angle    | d Value    | Net Intensity | Gross Intensity | Rel. Intensity | FWHM  |
|-------|----------|------------|---------------|-----------------|----------------|-------|
| 1     | 7.577 °  | 11.65886 Å | 869.145       | 1100.54         | 19.1%          | 0.105 |
| 2     | 9.730 °  | 9.08326 Å  | 831.810       | 1207.50         | 18.3%          | 0.108 |
| 3     | 10.287 ° | 8.59259 Å  | 292.138       | 729.403         | 6.4%           | 0.108 |
| 4     | 10.766 ° | 8.21069 Å  | 174.729       | 660.766         | 3.8%           | 0.193 |
| 5     | 11.363 ° | 7.78127 Å  | 753.586       | 1294.71         | 16.6%          | 0.105 |
| 6     | 11.849 ° | 7.46314 Å  | 2769.60       | 3351.13         | 60.8%          | 0.113 |
| 7     | 12.675 ° | 6.97841 Å  | 4553.15       | 5194.07         | 100.0%         | 0.113 |
| 8     | 13.327 ° | 6.63840 Å  | 284.646       | 964.154         | 6.3%           | 0.100 |
| 9     | 14.564 ° | 6.07704 Å  | 299.374       | 1032.07         | 6.6%           | 0.314 |
| 10    | 15.628 ° | 5.66574 Å  | 4248.56       | 5005.96         | 93.3%          | 0.118 |
| 11    | 17.263 ° | 5.13256 Å  | 1221.81       | 1979.35         | 26.8%          | 0.108 |
| 12    | 17.798 ° | 4.97961 Å  | 1091.26       | 1838.91         | 24.0%          | 0.108 |
| 13    | 18.270 ° | 4.85203 Å  | 2942.99       | 3677.82         | 64.6%          | 0.110 |
| 14    | 18.819 ° | 4.71167 Å  | 641.644       | 1356.74         | 14.1%          | 0.110 |
| 15    | 19.791 ° | 4.48225 Å  | 2199.45       | 2866.90         | 48.3%          | 0.122 |
| 16    | 20.466 ° | 4.33611 Å  | 2192.51       | 2817.42         | 48.2%          | 0.113 |
| 17    | 20.931 ° | 4.24079 Å  | 990.151       | 1561.17         | 21.7%          | 0.117 |
| 18    | 21.583 ° | 4.11415 Å  | 666.637       | 1214.89         | 14.6%          | 0.147 |
| 19    | 22.177 ° | 4.00523 Å  | 1498.02       | 2015.01         | 32.9%          | 0.115 |
| 20    | 22.454 ° | 3.95634 Å  | 225.152       | 725.481         | 4.9%           | 0.142 |
| 21    | 23.002 ° | 3.86340 Å  | 169.267       | 648.115         | 3.7%           | 0.109 |
| 22    | 23.518 ° | 3.77972 Å  | 507.188       | 977.983         | 11.1%          | 0.122 |
| 23    | 24.234 ° | 3.66972 Å  | 131.138       | 591.107         | 2.9%           | 0.100 |
| 24    | 24.699 ° | 3.60158 Å  | 560.629       | 1008.83         | 12.3%          | 0.109 |
| 25    | 25.286 ° | 3.51938 Å  | 369.786       | 812.381         | 8.1%           | 0.103 |
| 26    | 26.945 ° | 3.30637 Å  | 300.770       | 777.976         | 6.6%           | 0.174 |
| 27    | 27.206 ° | 3.27515 Å  | 359.588       | 848.364         | 7.9%           | 0.158 |
| 28    | 27.985 ° | 3.18572 Å  | 116.940       | 633.041         | 2.6%           | 0.174 |
| 29    | 28.622 ° | 3.11628 Å  | 158.250       | 688.880         | 3.5%           | 0.121 |
| 30    | 29.425 ° | 3.03302 Å  | 448.539       | 991.643         | 9.9%           | 0.122 |
| 31    | 29.898 ° | 2.98612 Å  | 305.497       | 853.775         | 6.7%           | 0.209 |
| 32    | 30.206 ° | 2.95635 Å  | 139.579       | 689.164         | 3.1%           | 0.286 |
| 33    | 31.718 ° | 2.81883 Å  | 95.8101       | 628.206         | 2.1%           | 0.266 |
| 34    | 32.622 ° | 2.74275 Å  | 279.750       | 783.028         | 6.1%           | 0.105 |
| 35    | 33.576 ° | 2.66699 Å  | 262.176       | 724.289         | 5.8%           | 0.120 |
| 36    | 35.629 ° | 2.51787 Å  | 209.480       | 632.959         | 4.6%           | 0.150 |

### 3. Analytical spectra of 15 & 16, 18, 22, 23, 2 in intermediates or

#### Nirmatrelvir

3.1 HPLC data, HRMS, and NMR of Compound 15&16 (compounds 15 and 16 are not separated)

##### 3.1.1 HPLC



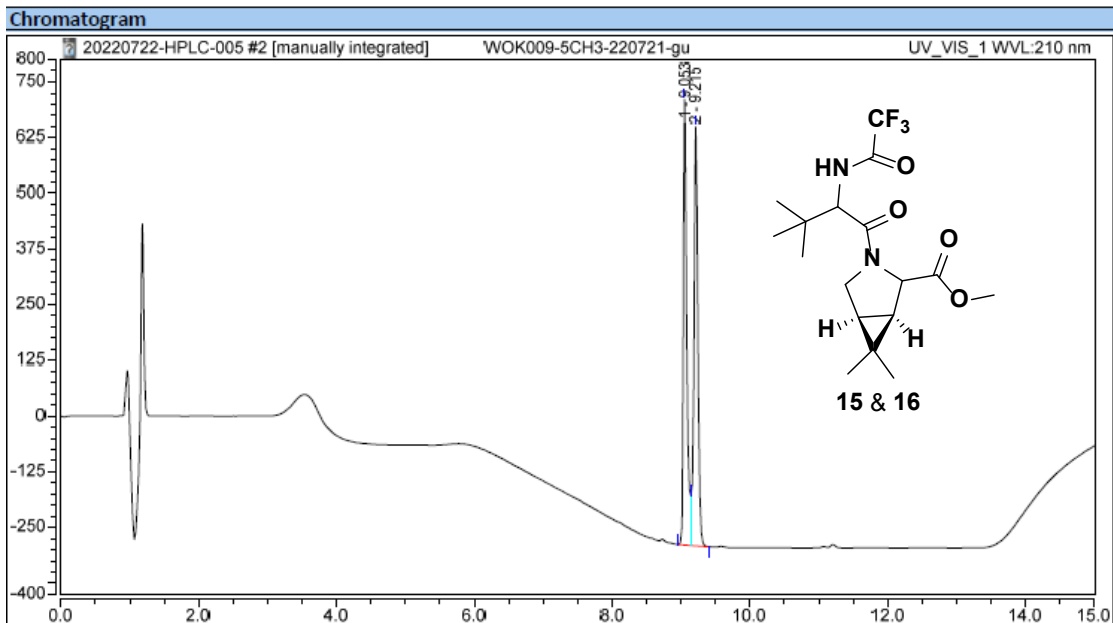

**Integration Results**

| No.    | Peak Name | Retention Time min | Area mAU*min | Height mAU | Relative Area % | Relative Height % | Amount n.a. |
|--------|-----------|--------------------|--------------|------------|-----------------|-------------------|-------------|
| 1      |           | 9.053              | 56.878       | 1000.418   | 48.38           | 51.56             | n.a.        |
| 2      |           | 9.215              | 60.681       | 939.897    | 51.62           | 48.44             | n.a.        |
| Total: |           |                    | 117.559      | 1940.315   | 100.00          | 100.00            |             |

### 3.1.2 HRMS

### Qualitative Compound Report

Data File: 20220722051-0725-003.d Sample Name: WOK009-SCH3  
 Sample Type: Sample Position: Vial 2  
 Instrument Name: Instrument 1 Acq Method:  
 DA Method: Default.m Comment: lot:220721  
 AcquiredTime: 7/25/2022 11:04:59 AM DataFile: D:\MassHunter\Data\2022-07\2022-07-25\20220722051-0725-003.d

**Compound Table**

| Compound Label          | RT    | Mass     | Abund  | Formula          | Tgt Mass | Diff (ppm) |
|-------------------------|-------|----------|--------|------------------|----------|------------|
| Cpd 1: C17 H25 F3 N2 O4 | 0.174 | 378.1767 | 225276 | C17 H25 F3 N2 O4 | 378.1766 | 0.15       |

| Compound Label          | RT    | Algorithm       | Mass     |
|-------------------------|-------|-----------------|----------|
| Cpd 1: C17 H25 F3 N2 O4 | 0.174 | Find By Formula | 378.1767 |

**MS Zoomed Spectrum**

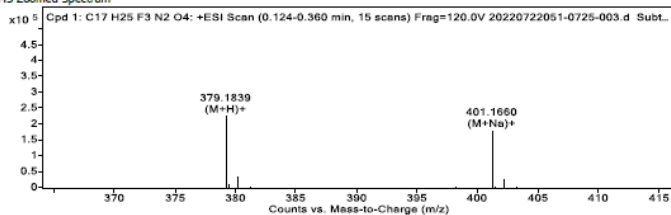

**MS Spectrum Peak List**

| m/z      | Calc m/z | Diff(ppm) | z | Abund  | Formula             | Ion     |
|----------|----------|-----------|---|--------|---------------------|---------|
| 379.1839 | 379.1839 | -0.02     | 1 | 225276 | C17 H26 F3 N2 O4    | (M+H)+  |
| 401.166  | 401.1659 | 0.45      | 1 | 180210 | C17 H25 F3 N2 Na O4 | (M+Na)+ |

--- End Of Report ---

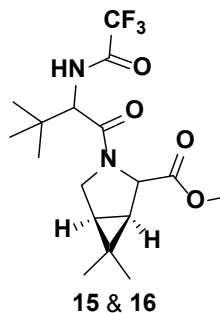



## 3.2 HPLC data, HRMS, and NMR of Compound 18

### 3.2.1 HPLC data

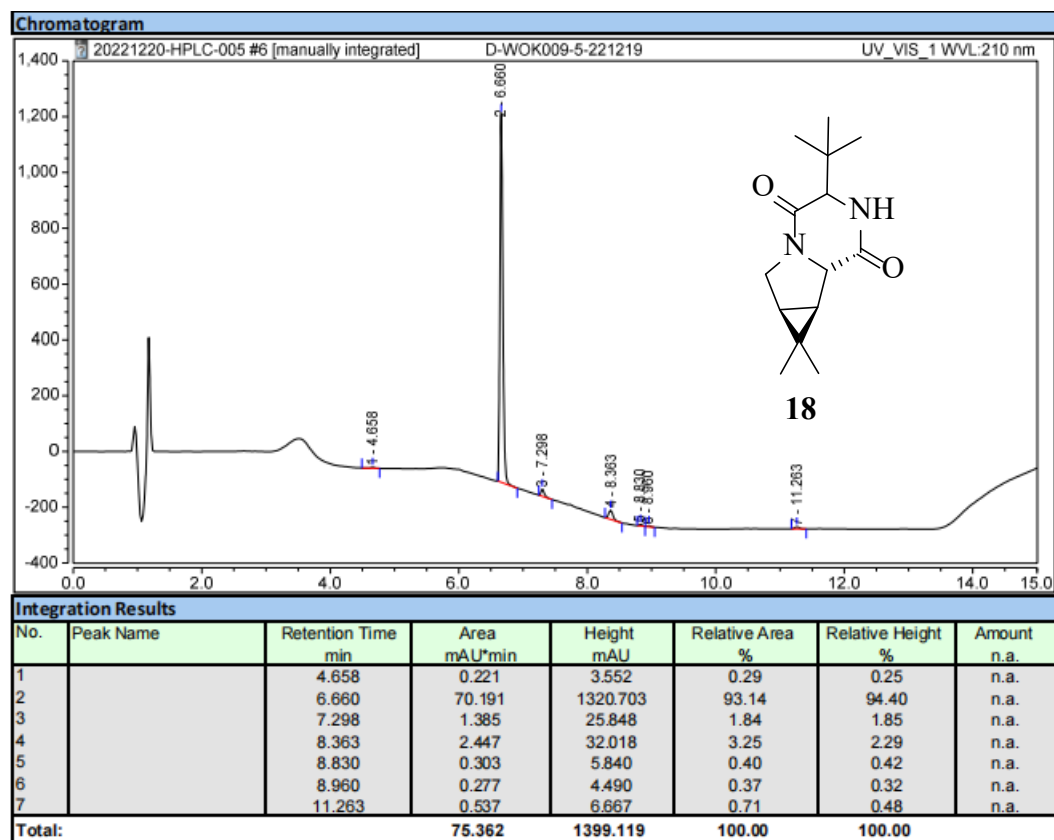

### 3.2.2 HRMS

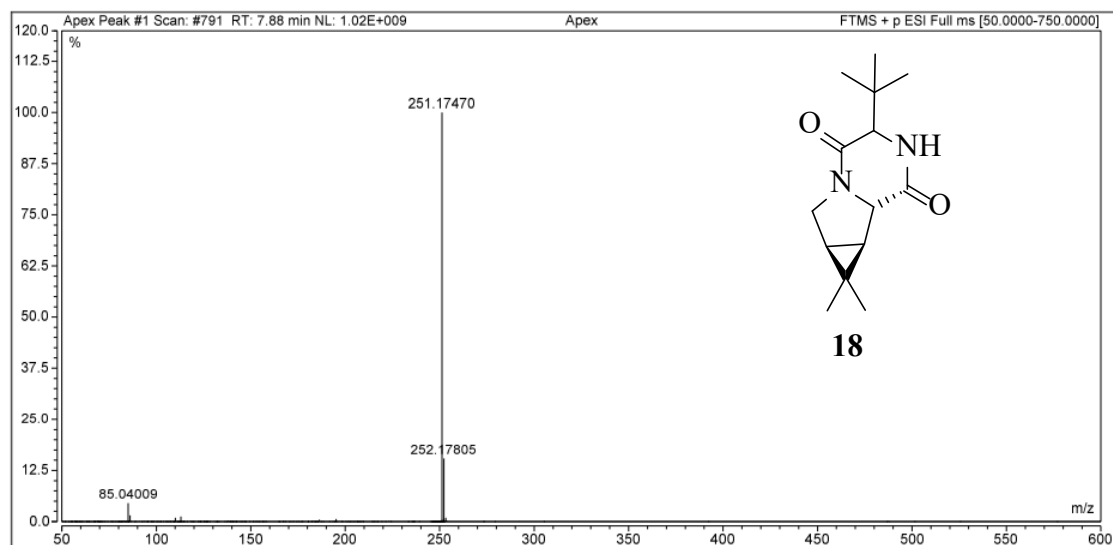

### 3.2.3 $^1\text{H}$ NMR (DMSO-d<sub>6</sub>)

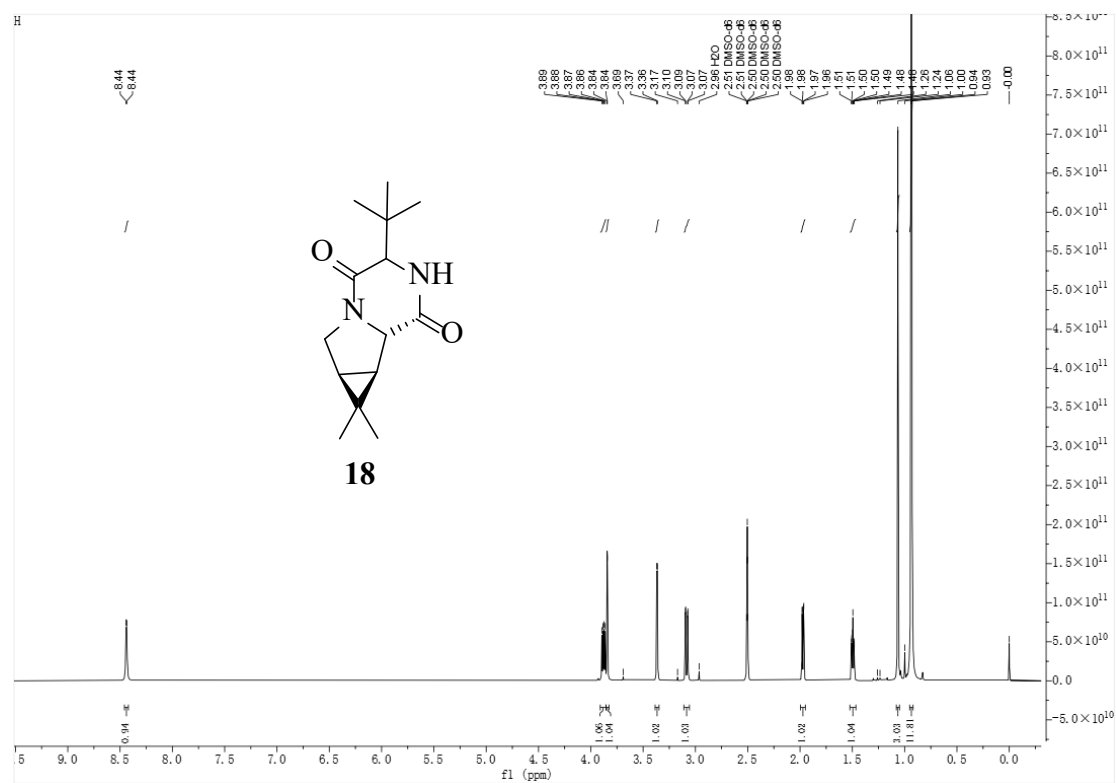

### 3.2.4 $^{13}\text{C}$ NMR (DMSO-d<sub>6</sub>)

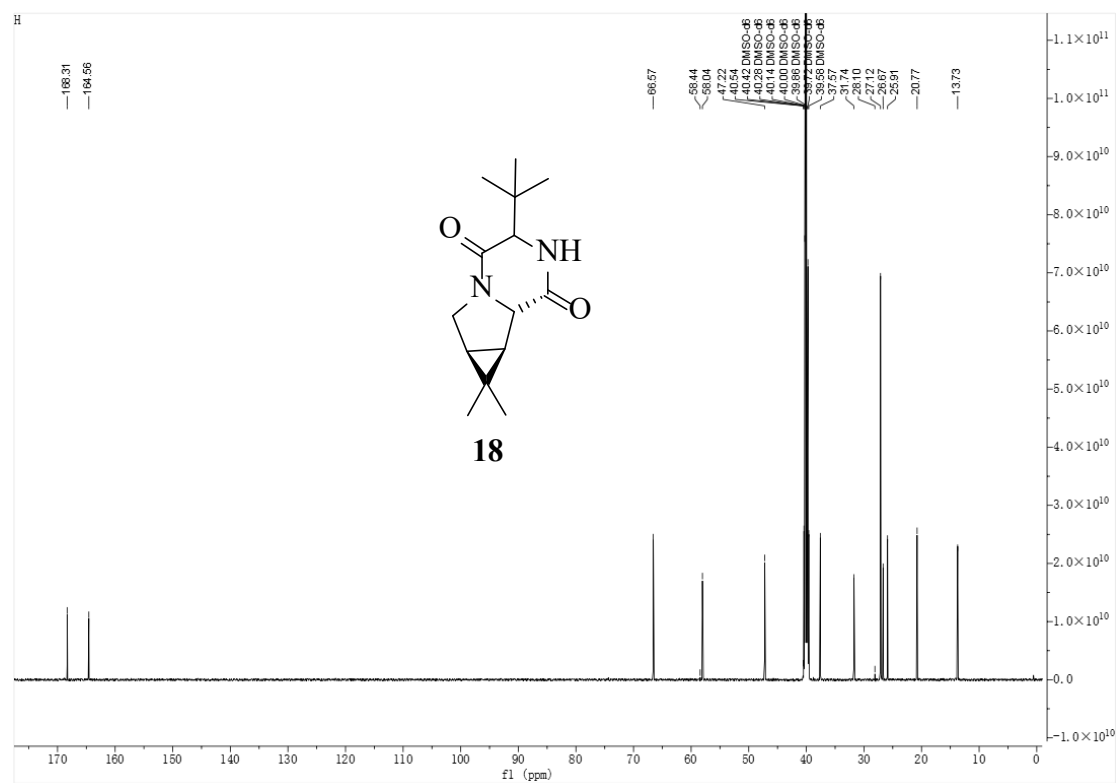

### 3.3 HPLC data, HRMS, and NMR of Compound 22

#### 3.3.1 HPLC

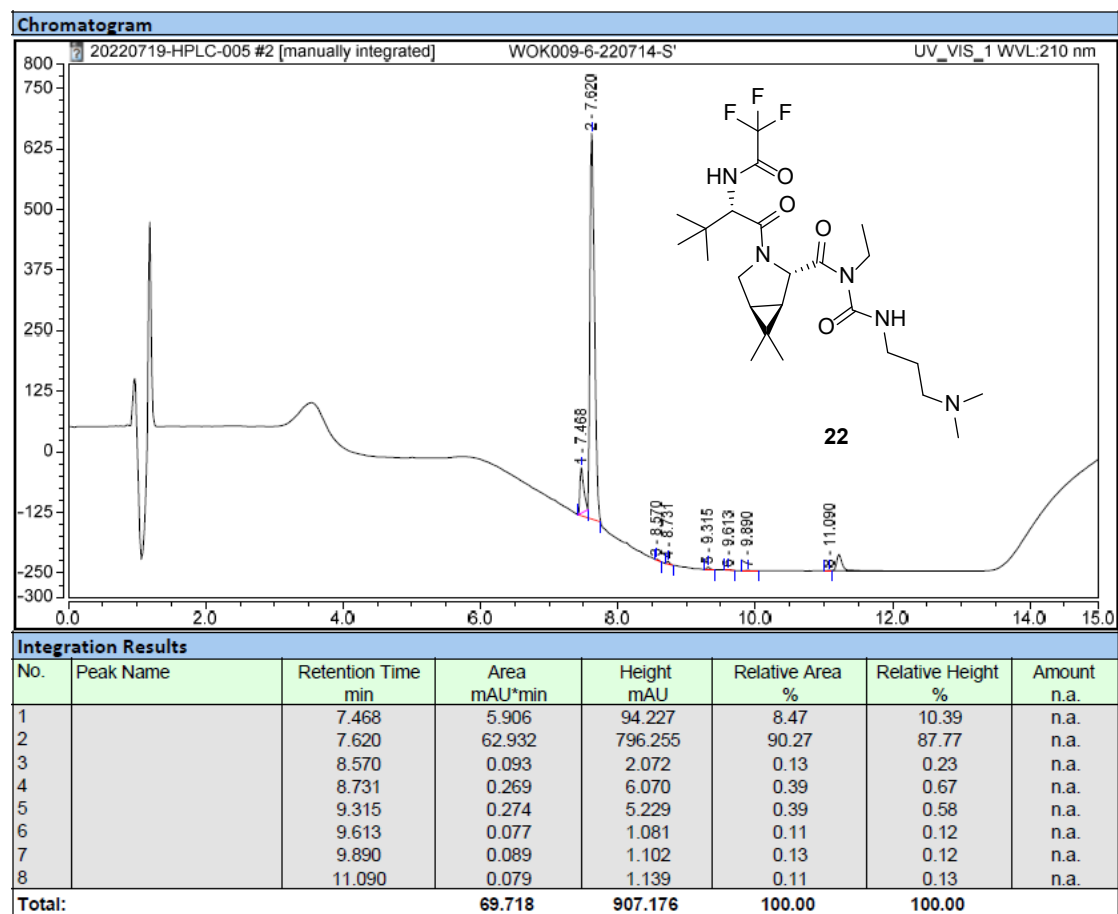

#### 3.3.2 HRMS

### Qualitative Compound Report

|                        |                        |                    |                                                              |
|------------------------|------------------------|--------------------|--------------------------------------------------------------|
| <b>Data File</b>       | 20220719048-0720-029.d | <b>Sample Name</b> | WOK009-6-IMPA                                                |
| <b>Sample Type</b>     | Sample                 | <b>Position</b>    | Vial 45                                                      |
| <b>Instrument Name</b> | Instrument 1           | <b>Acq Method</b>  |                                                              |
| <b>DA Method</b>       | Default.m              | <b>Comment</b>     | lot:220714                                                   |
| <b>AcquiredTime</b>    | 7/20/2022 4:39:30 PM   | <b>DataFile</b>    | D:\MassHunter\Data\2022-07\2022-07-20\20220719048-0720-029.d |

#### Compound Table

| Compound Label          | RT    | Mass     | Abund  | Formula          | Tgt Mass | Diff (ppm) |
|-------------------------|-------|----------|--------|------------------|----------|------------|
| Cpd 1: C24 H40 F3 N5 O4 | 0.193 | 519.3055 | 332705 | C24 H40 F3 N5 O4 | 519.3032 | 4.3        |

| Compound Label          | RT    | Algorithm       | Mass     |
|-------------------------|-------|-----------------|----------|
| Cpd 1: C24 H40 F3 N5 O4 | 0.193 | Find By Formula | 519.3055 |

#### MS Zoomed Spectrum

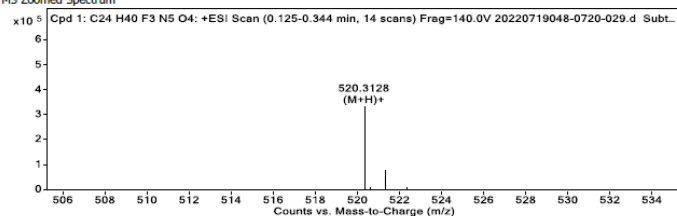

#### MS Spectrum Peak List

| m/z      | Calc m/z | Diff(ppm) | z | Abund  | Formula          | Ion    |
|----------|----------|-----------|---|--------|------------------|--------|
| 520.3128 | 520.3105 | 4.31      | 1 | 332705 | C24 H41 F3 N5 O4 | (M+H)+ |

--- End Of Report ---

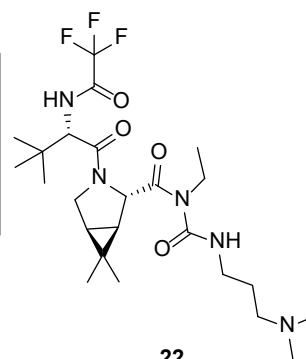

### 3.3.3 $^1\text{H}$ NMR (DMSO- $d_6$ )

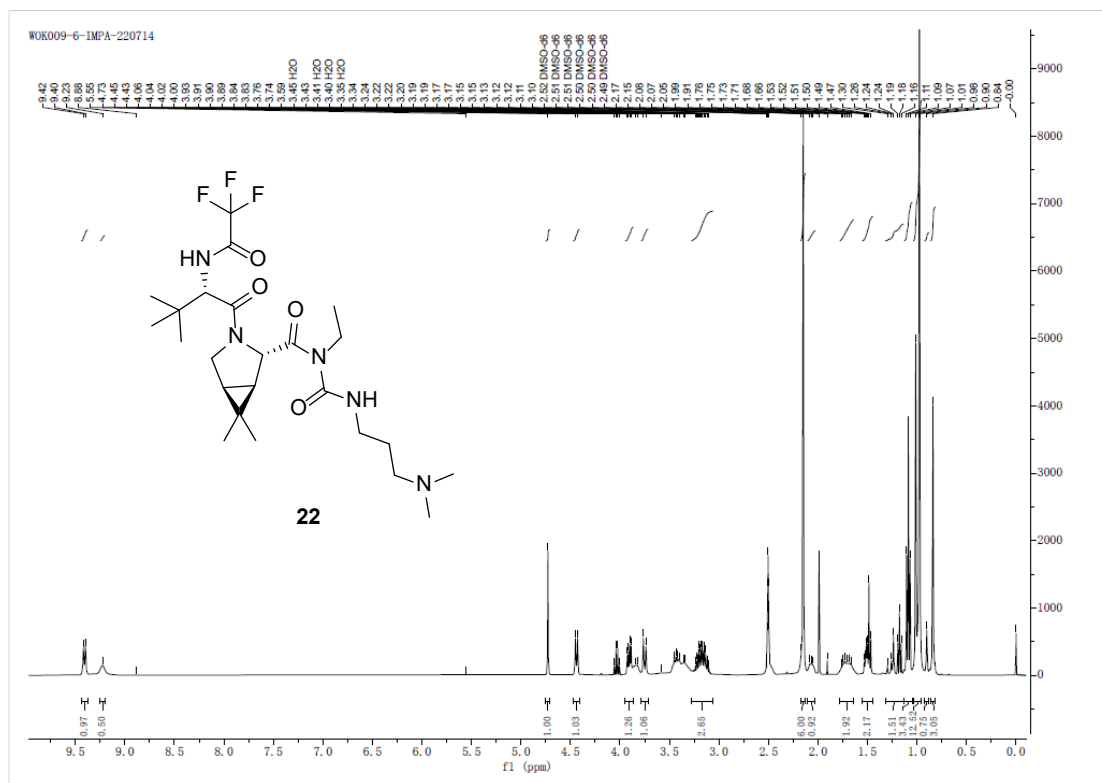

### 3.3.4 $^{13}\text{C}$ NMR (DMSO- $d_6$ )

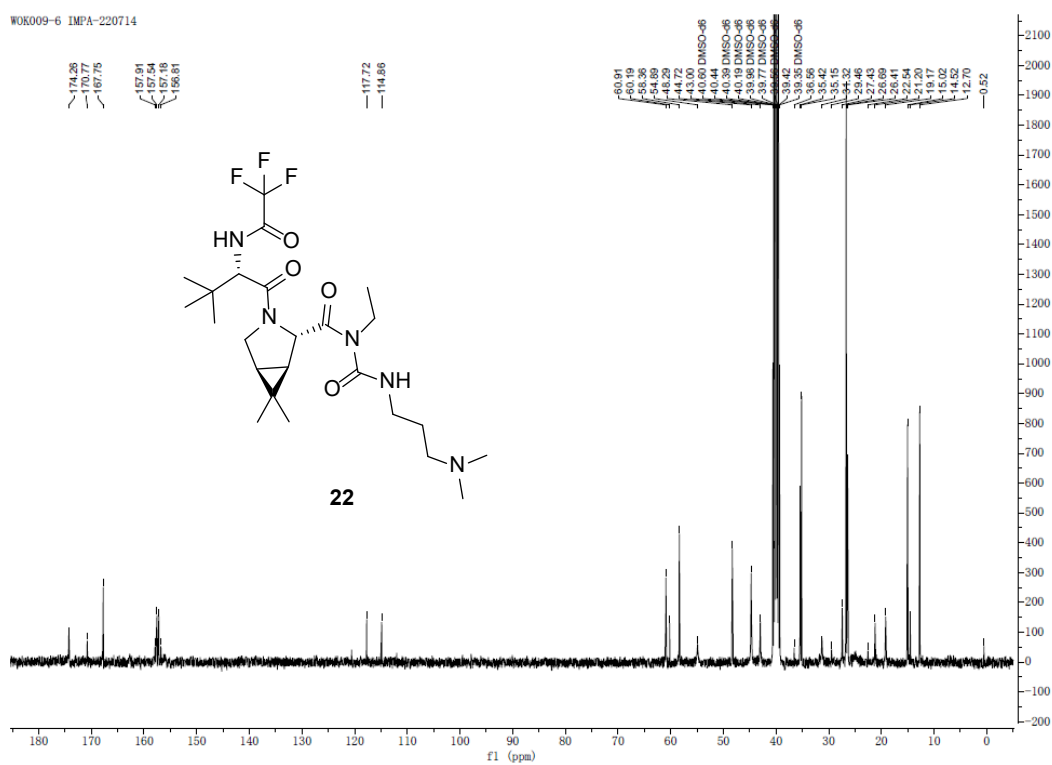

### 3.4 HPLC data, HRMS, and NMR of Compound 23

#### 3.4.1 HPLC

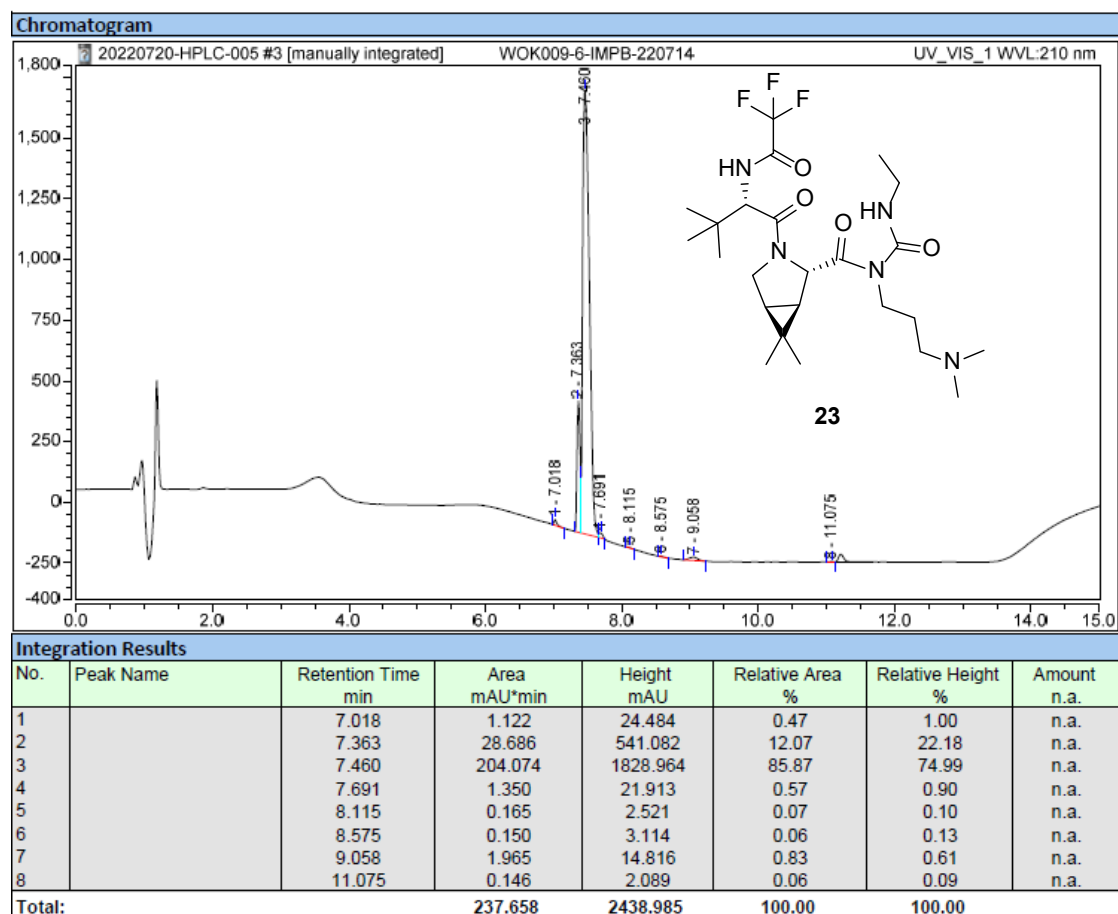

#### 3.4.2 HRMS

### Qualitative Compound Report

|                        |                        |                    |                                                              |
|------------------------|------------------------|--------------------|--------------------------------------------------------------|
| <b>Data File</b>       | 20220719050-0720-031.d | <b>Sample Name</b> | WOK009-6-IMPB                                                |
| <b>Sample Type</b>     | Sample                 | <b>Position</b>    | Vial 46                                                      |
| <b>Instrument Name</b> | Instrument 1           | <b>Acq Method</b>  |                                                              |
| <b>DA Method</b>       | Default.m              | <b>Comment</b>     | lot:220714                                                   |
| <b>AcquiredTime</b>    | 7/20/2022 4:46:02 PM   | <b>DataFile</b>    | D:\MassHunter\Data\2022-07\2022-07-20\20220719050-0720-031.d |

#### Compound Table

| Compound Label          | RT    | Mass     | Abund  | Formula          | Tgt Mass | Diff (ppm) |
|-------------------------|-------|----------|--------|------------------|----------|------------|
| Cpd 1: C24 H40 F3 N5 O4 | 0.187 | 519.3053 | 354997 | C24 H40 F3 N5 O4 | 519.3032 | 3.89       |

| Compound Label          | RT    | Algorithm       | Mass     |
|-------------------------|-------|-----------------|----------|
| Cpd 1: C24 H40 F3 N5 O4 | 0.187 | Find By Formula | 519.3053 |

#### MS Zoomed Spectrum

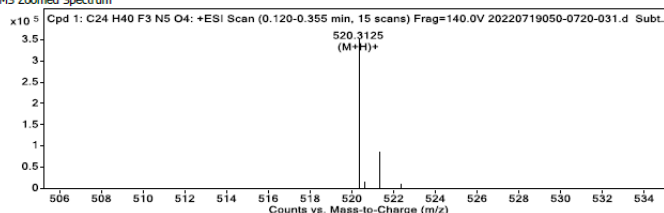

#### MS Spectrum Peak List

| m/z      | Calc m/z | Diff(ppm) | Abund  | Formula          | Ion    |
|----------|----------|-----------|--------|------------------|--------|
| 520.3125 | 520.3105 | 3.9       | 354997 | C24 H41 F3 N5 O4 | (M+H)+ |

--- End Of Report ---

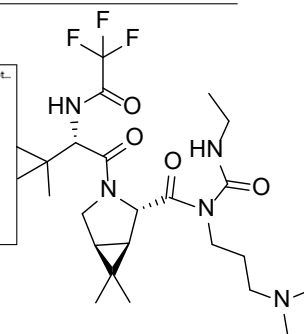





### 3.5 purity data of Compound 2

#### 3.5.1 GC (chemical purity)

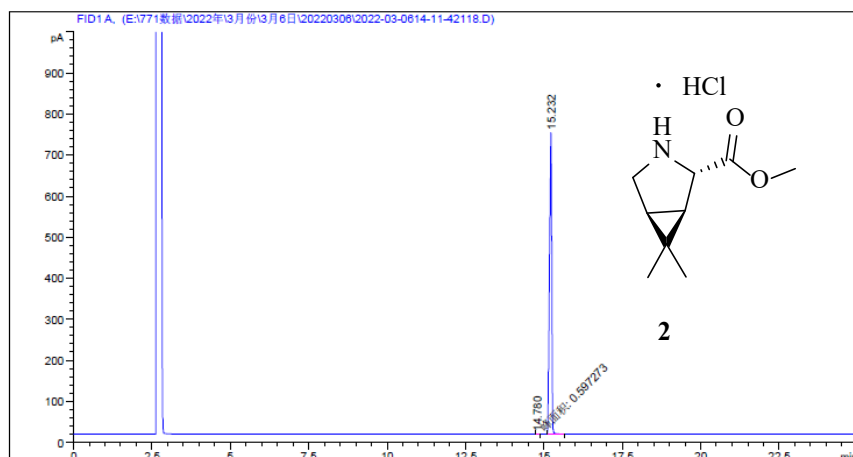

#### 面积百分比报告

排序 : 信号  
 乘积因子 : 1.0000  
 稀释因子 : 1.0000  
 内标使用乘积因子和稀释因子

信号 1: FID1 A,

| 峰 # | 保留时间 [min] | 类型 | 峰宽 [min] | 峰面积 [pA*s] | 峰高 [pA]    | 峰面积 %    |
|-----|------------|----|----------|------------|------------|----------|
| 1   | 14.780     | MM | 0.0676   | 5.97273e-1 | 1.47232e-1 | 0.01616  |
| 2   | 15.232     | BB | 0.0737   | 3696.35474 | 734.88110  | 99.98384 |

总量 : 3696.95201 735.02834

#### 3.5.2 HPLC (chiral purity)

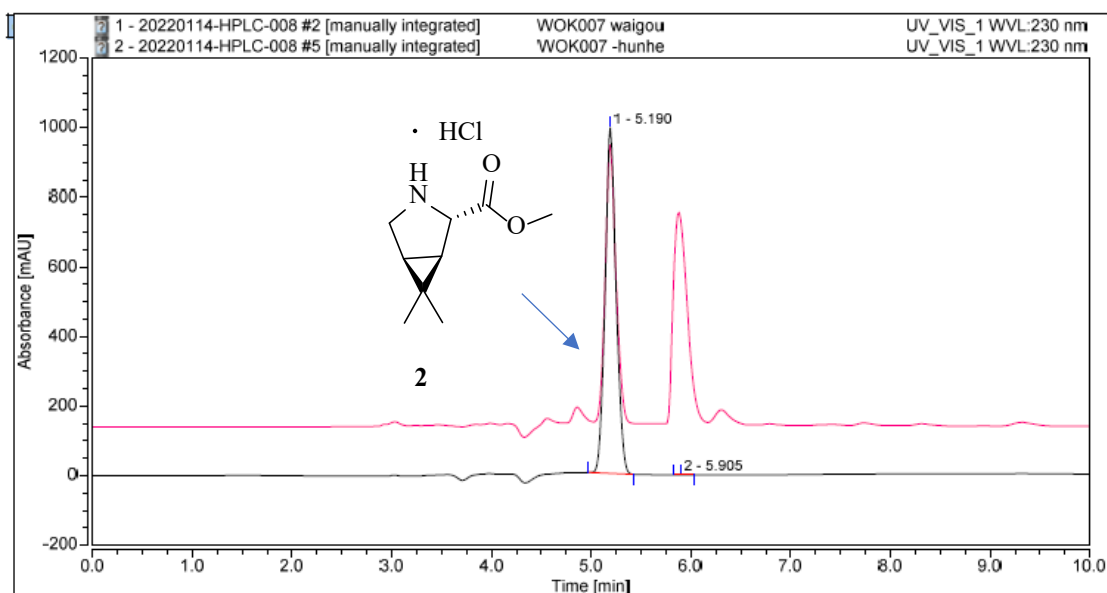

| Integration Results |           |                    |              |            |                 |                   |        |
|---------------------|-----------|--------------------|--------------|------------|-----------------|-------------------|--------|
| No.                 | Peak Name | Retention Time min | Area mAU*min | Height mAU | Relative Area % | Relative Height % | Amount |
| 1                   |           | 5.190              | 126.741      | 992.882    | 99.99           | 99.99             | n.a.   |
| 2                   |           | 5.905              | 0.007        | 0.079      | 0.01            | 0.01              | n.a.   |
| Total:              |           |                    | 126.748      | 992.961    | 100.00          | 100.00            |        |

#### 4 Crystal void and surface calculation of nirmatrelvir

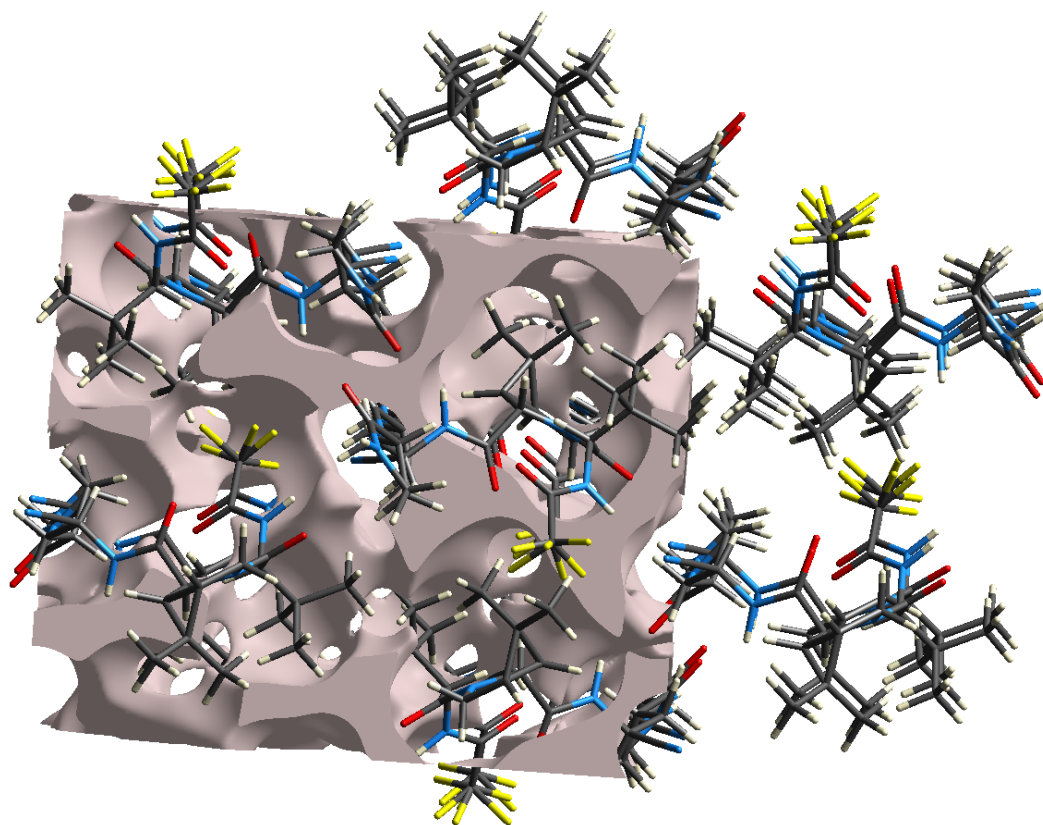

Figure 1. Crystal form A molecular void map

##### Crystal form A

Type Crystal Voids

Resolution High (Standard)

Isovalue 0.002

Volume 481.04 Å<sup>3</sup>

Area 1267.06 Å<sup>2</sup>

Globularity 0.234

Asphericity 0.090

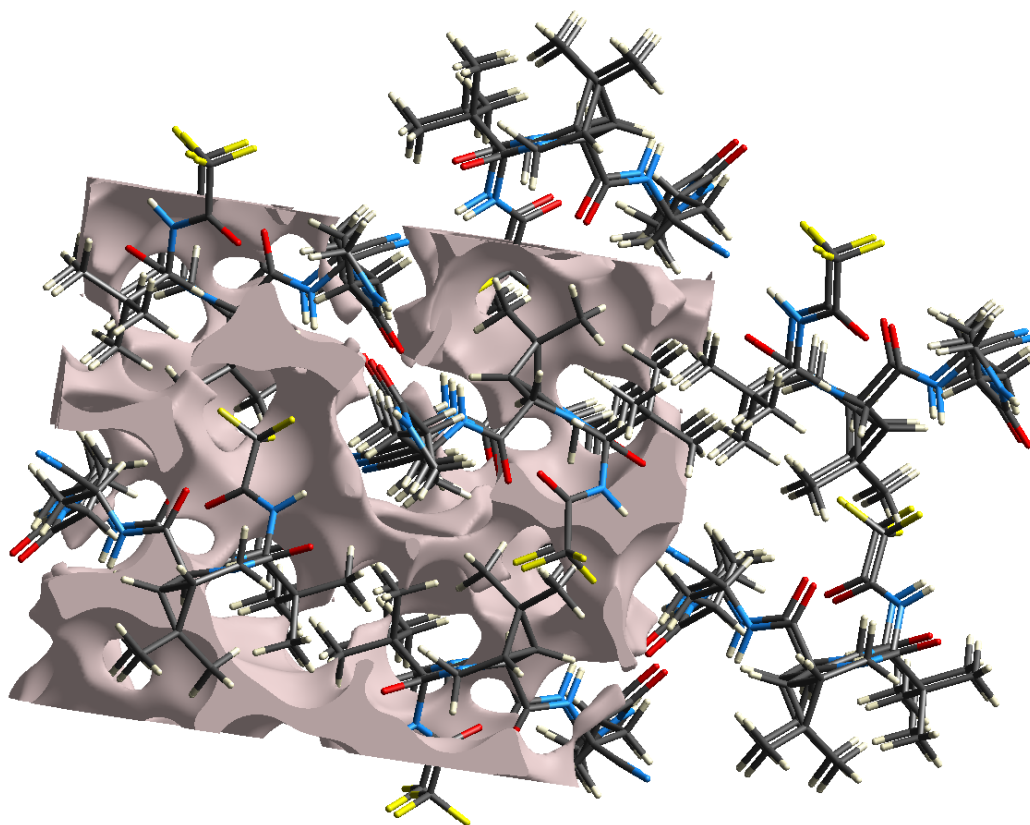

Figure 2. Crystal form B molecular void map

#### Crystal form B

Type Crystal Voids

Resolution High (Standard)

Isovalue 0.002

Volume 386.86 Å<sup>3</sup>

Area 1068.44 Å<sup>2</sup>

Globularity 0.240

Asphericity 0.105

### 5 Interaction energy calculation of nirmatrelvir

The pairwise intermolecular interaction energy was calculated using CrystalExplorer software (version 17.5) with experimental crystal geometry.<sup>1</sup> Considering the uncertainty of hydrogen position by single crystal X-ray diffraction, the hydrogen positions were normalized to standard neutron diffraction values during the calculation. The total intermolecular interaction energy for given molecule, is summed up the electrostatic, polarization, dispersion, and exchange-repulsion components terms with scale factors of 1.057, 0.740, 0.871, and 0.618. The intermolecular interaction is neglected with molecule-molecule distance more than 3.8 Å.

**Ref. 1** M. J. Turner, J. J. McKinnon, S. K. Wolff, D. J. Grimwood, P. R. Spackman, D. Jayatilaka and M. A. Spackman, CrystalExplorer17 (2017). University of Western Australia.

#### Crystal form A

Interaction Energies (kJ/mol) R is the distance between molecular centroids (mean atomic position) in Å. Total energies, only reported for two benchmarked energy models, are the sum of the four energy components, scaled appropriately (see the scale factor table below)

|  | N | Symop               | R     | Electron Density | E_ele | E_pol | E_dis | E_rep | E_tot |
|--|---|---------------------|-------|------------------|-------|-------|-------|-------|-------|
|  | 2 | $x+1/2, -y+1/2, -z$ | 11.24 | B3LYP/6-31G(d,p) | -7.0  | -1.7  | -26.9 | 16.7  | -21.8 |
|  | 2 | $-x, y+1/2, -z+1/2$ | 10.53 | B3LYP/6-31G(d,p) | -3.7  | -1.6  | -18.7 | 5.3   | -18.1 |
|  | 2 | $x, y, z$           | 9.21  | B3LYP/6-31G(d,p) | -15.8 | -6.4  | -52.8 | 36.2  | -45.0 |
|  | 2 | $-x+1/2, -y, z+1/2$ | 10.21 | B3LYP/6-31G(d,p) | -30.3 | -8.9  | -18.9 | 39.9  | -30.5 |
|  | 2 | $x+1/2, -y+1/2, -z$ | 10.30 | B3LYP/6-31G(d,p) | -39.2 | -12.2 | -29.9 | 31.7  | -56.9 |
|  | 2 | $-x+1/2, -y, z+1/2$ | 11.78 | B3LYP/6-31G(d,p) | 0.4   | -0.9  | -15.2 | 4.2   | -11.0 |
|  | 2 | $-x, y+1/2, -z+1/2$ | 7.79  | B3LYP/6-31G(d,p) | -5.2  | -3.2  | -45.8 | 16.8  | -35.0 |

Table S1. Intermolecular interaction energies ( $\text{kJ mol}^{-1}$ ) of crystal form A estimated using B3LYP/6-31G (d, p) dispersion-corrected DFT models (nirmatrelvir as the central molecule)

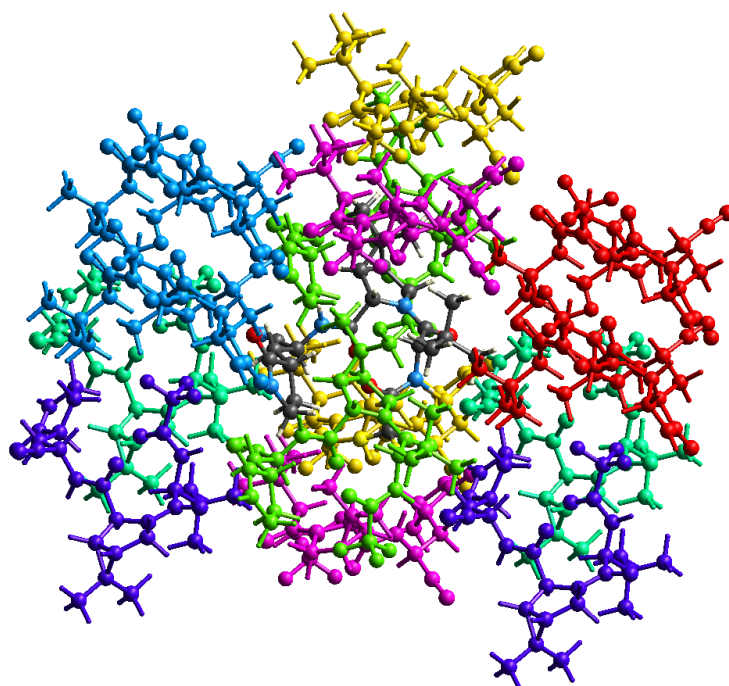

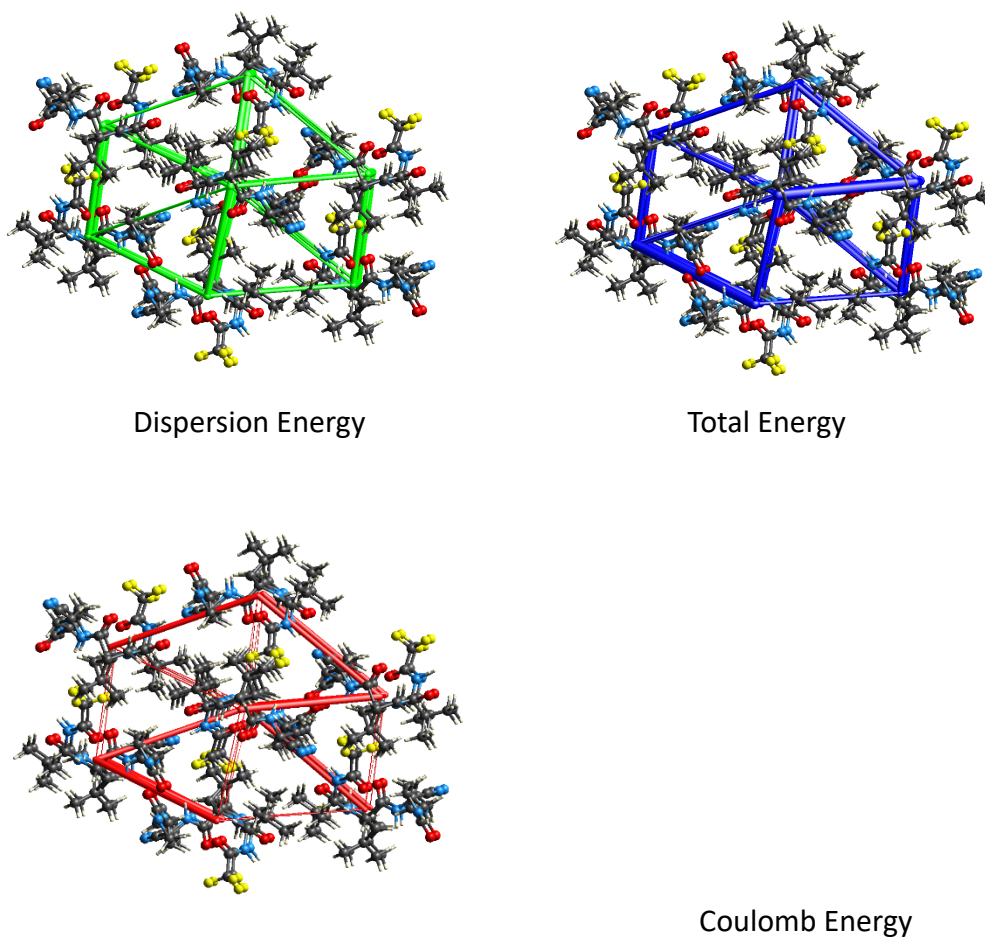

Figure 3. Energy frame diagram

### Crystal form B

Interaction Energies (kJ/mol) R is the distance between molecular centroids (mean atomic position) in Å. Total energies, only reported for two benchmarked energy models, are the sum of the four energy components, scaled appropriately (see the scale factor table below)

|  | N | Symop             | R     | Electron Density | E_ele | E_pol | E_dis | E_rep | E_tot  |
|--|---|-------------------|-------|------------------|-------|-------|-------|-------|--------|
|  | 2 | -x, y+1/2, -z+1/2 | 10.65 | B3LYP/6-31G(d,p) | -1.1  | -10.0 | -18.2 | 1.2   | -23.6  |
|  | 2 | x, y, z           | 9.69  | B3LYP/6-31G(d,p) | -36.8 | -16.2 | -41.6 | 23.5  | -72.6  |
|  | 2 | -x+1/2, -y, z+1/2 | 9.84  | B3LYP/6-31G(d,p) | -65.8 | -28.8 | -28.7 | 24.2  | -100.9 |
|  | 2 | x+1/2, -y+1/2, -z | 11.74 | B3LYP/6-31G(d,p) | 7.0   | -4.5  | -18.6 | 4.5   | -9.3   |
|  | 2 | x+1/2, -y+1/2, -z | 10.75 | B3LYP/6-31G(d,p) | -9.8  | -6.8  | -27.5 | 19.1  | -27.5  |
|  | 2 | -x, y+1/2, -z+1/2 | 7.85  | B3LYP/6-31G(d,p) | -11.8 | -27.4 | -43.4 | 11.9  | -63.1  |
|  | 2 | -x+1/2, -y, z+1/2 | 11.79 | B3LYP/6-31G(d,p) | -13.8 | -9.6  | -16.8 | 2.3   | -34.9  |

Table S2. Intermolecular interaction energies (kJ mol<sup>-1</sup>) of crystal form B estimated using B3LYP/6-31G (d, p) dispersion-corrected DFT models (nirmatrelvir as the central molecule)

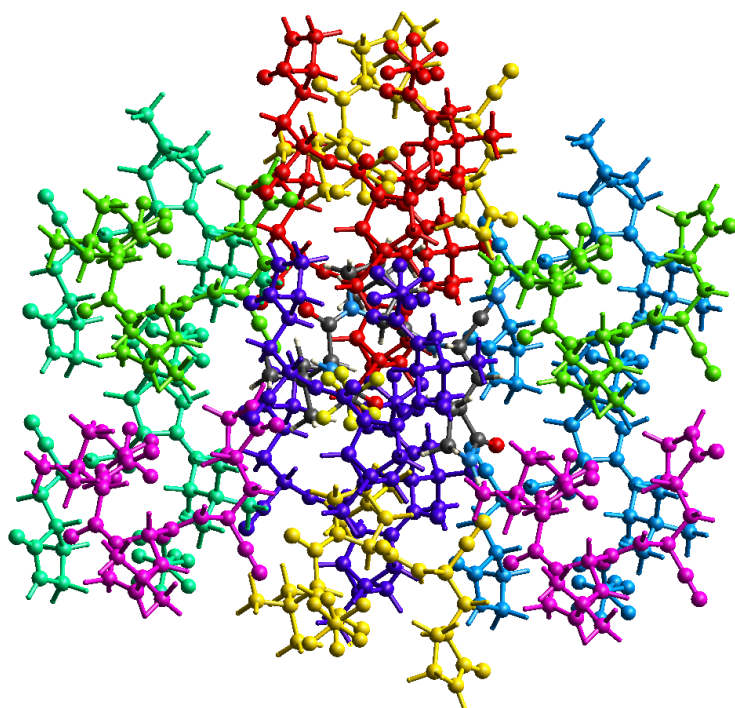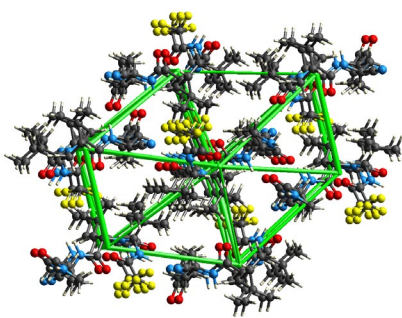

Dispersion Energy

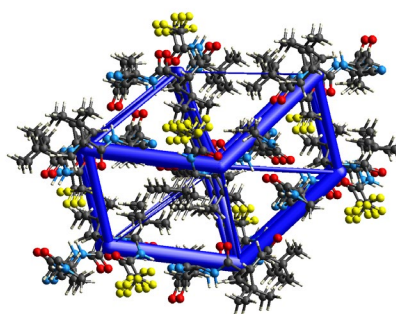

Total Energy

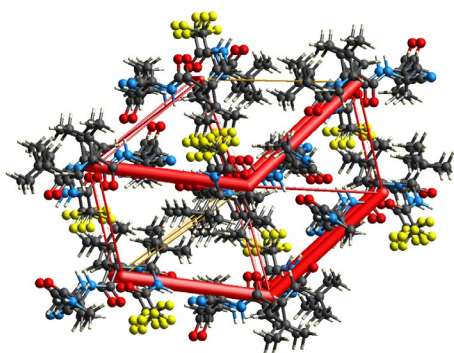

Coulomb Energy

Figure 4. Energy frame diagram
